1           **A complex symbiosis involving within species variation in the response of**  
2                                           ***Dictyostelium amoebae* to *Burkholderia* bacteria**

3   **Authors:** Longfei Shu<sup>a\*</sup>, Debra A. Brock<sup>a\*</sup>, Katherine S. Geist<sup>a</sup>, Jacob W. Miller<sup>b</sup>, David  
4   C. Queller<sup>a</sup>, Joan E. Strassmann<sup>a#</sup>, Susanne DiSalvo<sup>b#</sup>,

5   <sup>a</sup>Department of Biology, Washington University in St. Louis, One Brookings Drive St.  
6   Louis, MO 63130

7   <sup>b</sup>Department of Biological Sciences, Southern Illinois University Edwardsville,  
8   Edwardsville, IL 62026

9   Running Title: Conflict in the *Dictyostelium-Burkholderia* symbiosis

10   #Address correspondence to Susanne DiSalvo [sdisalv@siue.edu](mailto:sdisalv@siue.edu) or Joan Strassmann  
11   [strassmann@wustl.edu](mailto:strassmann@wustl.edu)

12   L.S., D.A.B., and S.D. contributed equally to this work

13 **Abstract**

14 Recent symbioses, particularly facultative ones, are well suited for unravelling the  
15 evolutionary give and take between partners. Here we look at variation in wild-collected  
16 samples of the social amoeba *Dictyostelium discoideum* and their relationships with  
17 bacterial symbionts, *Burkholderia hayleyella* and *Burkholderia agricolaris*. Only about a  
18 third of field-collected amoebae carry a symbiont. We cured and cross-infected *D.*  
19 *discoideum* hosts with different symbiont association histories and then compared the  
20 responses of the amoebae to each symbiont type. Before curing, field-collected clones  
21 did not vary significantly in overall fitness, but infected hosts produced morphologically  
22 different multicellular structures. After curing and re-infecting, host fitness declined  
23 overall. However, natural *B. hayleyella* hosts suffered fewer fitness costs when re-  
24 infected with *B. hayleyella*, indicating that they have evolved mechanisms to tolerate  
25 their naturally acquired symbiont. Exploring relationships between endosymbionts and  
26 hosts that vary within species may also reveal much about disease dynamics.

## 27 INTRODUCTION

28 Relationships are complicated because each party has evolved to maximize its own  
29 interests. Mutualisms arise when different parties have abilities or resources easy for  
30 them and hard for the partner, under conditions where exploitation is controlled (2015).  
31 Mutualisms where one party is microbial fall under the general category of symbiosis.  
32 Symbioses are rife with potential conflict (Dale and Moran, 2006; Estrela et al., 2016;  
33 Garcia and Gerardo, 2014; Moran, 2007; Oliver et al., 2005). Despite this, symbiotic  
34 relationships are pervasive and persistent (Douglas, 2008; Moran et al., 1993;  
35 Wernegreen, 2017; Werner et al., 2015). The stability and ubiquity of these interactions  
36 implies that conflict can be managed or minimized by partners over multiple generations.  
37 However, stability does not imply stagnation. Often, we only observe a close-up of these  
38 relationships from brief snap-shots. If we zoom out over evolutionary time, we might  
39 better illuminate an ongoing tug-of-war (Ferdy and Godelle, 2005; Hosokawa et al.,  
40 2016). Indeed, the view that symbiotic associations fluctuate along a mutualism-to-  
41 parasitism continuum is increasingly appreciated (McFall-Ngai et al., 2013).

42 Intracellular endosymbiosis involves a particularly intricate dance between partners.  
43 Intracellular endosymbionts must invade, survive, and replicate within host cells and  
44 move to new hosts. To exploit their host niche, mutualistic endosymbionts evolve  
45 specialized lifestyles that parallel those of intracellular pathogens (Casadevall, 2008;  
46 McCutcheon and Moran, 2011; Soto et al., 2009). Despite initial exploitative strategies,  
47 some endosymbionts become beneficial or even obligate for host survival, a situation  
48 common for many insect nutritional endosymbioses (Douglas, 2009). Strict vertical  
49 transmission of endosymbionts typically promotes a more tranquil relationship as the

50 evolutionary fates of the two parties become increasingly intertwined (Ferdy and Godelle,  
51 2005; Hosokawa et al., 2016). Host dependency also often leads to the reduction in size  
52 of symbiont genomes as they become more streamlined for life within their host,  
53 something true for both beneficial and pathogenic endosymbionts (Dale and Moran,  
54 2006). Some symbionts are not vertically transmitted but instead are acquired  
55 horizontally, a category that includes facultative symbioses. These are more likely to  
56 retain active conflicts. This has been experimentally demonstrated by manipulating the  
57 jellyfish symbiont *Symbiodinium microadriaticum* towards solely vertical or horizontal  
58 transmission modes, leading to the evolution of more mutualistic or parasitic lineages  
59 respectively (Sachs and Wilcox, 2006). Though horizontal transmission can favor  
60 symbionts that behave more parasitically, selection can favor hosts that employ more  
61 severe countermeasures to limit symbiont entry or growth (Nyholm and McFall-Ngai,  
62 2004; Ratzka et al., 2012; Reynolds and Rolff, 2008). Indeed, host-driven control can be  
63 extreme, as demonstrated by the ability of *Paramecium bursaria* to manipulate its  
64 facultative nutritional symbiont (*Chlorella* sp.) in a relationship that provides no apparent  
65 benefit for the imprisoned symbiont (Lowe et al., 2016).

66 Symbiotic relationships may be positive or negative under different environmental  
67 conditions (Leung and Poulin, 2008; Pérez-Brocal et al., 2011). An interesting example  
68 of context dependency occurs in the *Acyrtosiphon pisum*-*Hamiltonella defensa*  
69 symbiosis (Oliver et al., 2003, 2005). *H. defensa* infection confers host resistance to  
70 parasitoid attack, with resistance being greater for hosts co-infected with *Serratia*  
71 *symbiotica* (Oliver et al., 2006). However, co-infection comes at a high fecundity cost,  
72 such that in parasitoid free environments, host fitness is reduced compared to uninfected

73 counterparts (Oliver et al., 2006). This interplay between reproductive strategy, context,  
74 and evolutionary history illustrates the complexity and fluidity of symbiosis.

75 The facultative endosymbiosis between the social amoeba *Dictyostelium discoideum* and  
76 *Burkholderia* bacteria provides a promising system for insight into symbiosis dynamics  
77 (Brock et al., 2011; DiSalvo et al., 2015). *D. discoideum* is a soil dwelling amoeba with  
78 an interesting life cycle involving unicellular and multicellular stages. During the  
79 unicellular stage, amoebae consume bacteria by phagocytosis and divide. When prey  
80 are scarce, amoebae aggregate by tens of thousands to form multicellular slugs that  
81 move towards heat and light, seeking out a location to form fruiting bodies. These fruiting  
82 bodies consist of a stalk of sacrificial dead cells which support a globular sorus  
83 containing hardy spore cells (Kessin, 2001). When spores are dispersed, they germinate  
84 into vegetative amoebae and the cycle continues. Processes employed by specialized  
85 immune-like cells (sentinel cells) during slug migration and fruiting body formation  
86 remove any remaining bacteria, typically producing bacteria-free sori (Brock et al., 2011;  
87 Chen et al., 2007; Cosson and Lima, 2014).

88 However, some *D. discoideum* isolates harvested from the wild are infected with  
89 *Burkholderia* symbionts (Brock et al., 2011). Infection persists in the lab throughout the  
90 social cycle, where intracellular bacteria can be visualized within spores and sori  
91 (DiSalvo et al., 2015). Infection can be terminated by treating hosts with antibiotics and  
92 induced by exposing naïve hosts to *Burkholderia*, thereby allowing us to easily mix and  
93 match partners and study subsequent fitness consequences (Brock et al., 2016a;  
94 DiSalvo et al., 2015).

95 *D. discoideum* also has a meiotic sexual process, that occurs much less frequently than  
96 the asexual proliferation process of binary fission that amoebae go through every few  
97 hours (Bloomfield et al., 2010). The asexual binary fission process results in lineages  
98 that can be quite different, though all of the same species. Thus, a lineage that has  
99 acquired a bacterial endosymbiont can evolve to tolerate it independent of uninfected  
100 lineages at least for the thousands of generations before sexual recombination.  
101 Comparing such lineages can illuminate how natural selection operates in early stages of  
102 symbiosis.

103 The *Dictyostelium-Burkholderia* association is particularly compelling for studying the  
104 parasitism to mutualism continuum in endosymbiosis because the fitness consequences  
105 of infection are context dependent. Under standard laboratory growth conditions,  
106 *Burkholderia* infection is detrimental for hosts because it decreases slug migration and  
107 spore production (Brock et al., 2016a; DiSalvo et al., 2015). However, infection can be  
108 beneficial. Infection induces secondary carriage of edible bacteria (*Burkholderia* is  
109 typically inedible), which can increase host fitness in food scarce conditions when the  
110 carried food bacteria reseed new environments with a food source (Brock et al., 2011;  
111 DiSalvo et al., 2015). Additionally, infected hosts are less harmed by ethidium bromide  
112 exposure, possibly mediated by bacterial degradation of the toxin (Brock et al., 2016a).

113 We have identified three *Burkholderia* species associated with *Dictyostelium*: *B.*  
114 *agricolaris*, *B. hayleyella*, and *B. bonniea* (Brock et al., 2018). Most of our work has been  
115 conducted with the first two species, which differentially impact host fitness. Here we  
116 probe the interaction between host and symbiont genotypes (with regards to their  
117 association history) with infection outcomes. We use standard laboratory conditions in

118 which symbiont infection is shifted towards host detrimental outcomes. Since all three  
119 *Burkholderia* species can be cultured on Petri plates with standard media, none of them  
120 are entirely dependent on *Dictyostelium* for survival.

121 We find that *B. hayleyella* is most detrimental for *D. discoideum* hosts in general, but is  
122 most costly to those first exposed to it in the lab. We also document symbiont localization  
123 and morphological symptoms in hosts throughout development. Although both species of  
124 bacteria can be observed within phagocytic vacuoles, *B. hayleyella* infects more cells  
125 and damages fruiting body structures. These morphological aberrations are also less  
126 severe in native-*hayleyella* hosts, suggesting that native hosts have evolved  
127 mechanisms to withstand symbiont colonization.

## 128 **RESULTS**

### 129 ***Impact of B. agricola and B. hayleyella on D. discoideum spore production***

130 Our first goal was to clarify how infection of *Dictyostelium* by *Burkholderia* symbionts  
131 differentially influences host fitness. We used 12 wild-collected clones, from each of  
132 three original conditions, uninfected with *Burkholderia*, infected with *B. agricolaris*, or  
133 infected with *B. hayleyella* (Table 1). We refer to these three types respectively as naïve  
134 hosts, native-*agricolaris* hosts, and native-*hayleyella* hosts. The word “host” always  
135 means *D. discoideum*, and sometimes refers to potential hosts not actually infected with  
136 *Burkholderia*. Amoebae, spores, cells, slugs, fruiting bodies, stalks, and sori refer only to  
137 *D. discoideum*.

138 We looked at *D. discoideum* spore viability and other measures under the following  
139 conditions: a) natural field state (naive, native-*agricolaris*, native-*hayleyella*), b) those

140 same hosts cured of *Burkholderia* (antibiotic treated), and c) condition after curing and  
141 re-infecting (with either *B. agricolaris* or *B. hayleyella*) (Figure 1). We quantified percent  
142 spore viability and number of spores produced (Figure 2, and Supplemental Tables S1-  
143 S2). We multiplied these two measures to get a single main measure of fitness, viable  
144 spores produced.

#### 145 ***D. discoideum* fitness does not differ by wild *Burkholderia* infection status**

146 We found that infection status in the field did not affect total viable spore counts for  
147 naïve, native-*agricolaris*, or native-*hayleyella* hosts (Figure 2a and Table S1a) (linear  
148 mixed model (LMM),  $\Delta\text{AIC} = -1.57$ ,  $\chi^2 = 5.57$ ,  $\text{DF} = 2$ ,  $P = 0.062$ ). Thus, field-infected  
149 native hosts do not seem to suffer any net fitness costs from infection by this measure.

#### 150 ***D. discoideum* fitness does not decrease with antibiotic treatment**

151 To make parallel comparisons when we newly infected *D. discoideum* with either of the  
152 two *Burkholderia* species, we first had to cure all hosts and be sure that curing in itself  
153 did not decrease fitness. We found that wild-collected hosts of our three categories did  
154 not experience lowered fitness after being cured with antibiotics (Figure 2a&b) (viable  
155 spore production: LMM,  $\Delta\text{AIC} = 1.74$ ,  $\chi^2 = 2.26$ ,  $\text{DF} = 2$ ,  $P = 0.32$ , Table S1b). Antibiotic  
156 treatment actually increased viable spore production of native-*agricolaris* hosts  
157 compared to uncured native-*agricolaris* hosts (LMM,  $\Delta\text{AIC} = -5.68$ ,  $\chi^2 = 9.68$ ,  $\text{DF} = 2$ ,  $P =$   
158  $0.008$ ; Figure 2a&b).

#### 159 ***D. discoideum* fitness decreases with exposure to *Burkholderia***



160 To test the effects of *Burkholderia* on all types of field-collected hosts, we compared  
161 viable spore production of cured *D. discoideum* hosts versus those same hosts artificially  
162 infected with *B. agricolaris* or *B. hayleyella* (Figure 2b, 2c, 2d). We found an overall effect  
163 on total spore viability with the addition of *Burkholderia* to all antibiotic-cured hosts (LMM,  
164  $\Delta\text{AIC} = -198.81$ ,  $\chi^2 = 210.81$ ,  $\text{DF} = 6$ ,  $P \ll 0.001$ ). Addition of either *B. agricolaris* (Wald  $t$   
165  $= -10.19$ ,  $\text{DF} = 96$ ,  $P \ll 0.001$ ) or *B. hayleyella* ( $t = -13.58$ ,  $\text{DF} = 96$ ,  $P \ll 0.001$ ) to any of  
166 the cured hosts decreased their fitness (Figure 2; Table S2).

167 We then asked whether *D. discoideum* hosts are adapted to the *Burkholderia* species  
168 they carried in the field. Overall, the addition of *B. hayleyella* to *D. discoideum* led to  
169 significantly lower viable spore production than did the addition of *B. agricolaris* (Wald  $t =$   
170  $-4.48$ ,  $\text{DF} = 96$ ,  $P \ll 0.001$ ) (Figure 2). We also tested for an interaction between native  
171 host status and which *Burkholderia* species was added. There was an interaction effect  
172 on total viable spore production (LMM,  $\Delta\text{AIC} = -199.93$ ,  $\chi^2 = 215.92$ ,  $\text{DF} = 8$ ,  $P \ll 0.001$ )  
173 (Table S2e). To address specific adaptation, we performed separate tests for each  
174 *Burkholderia* species added. When *B. hayleyella* was added to the three cured hosts,  
175 native-*hayleyella* hosts had higher fitness than did either native-*agricolaris* or naïve hosts  
176 (both  $P \ll 0.001$ , Figure 2d; Table S2e). In contrast, native-*agricolaris* hosts did not have  
177 significantly higher fitness with the addition of *B. agricolaris* than either native-*hayleyella*  
178 or naïve hosts (both  $P > 0.05$ , (Figure 2c; Table S2e). However, there was a trend in the  
179 direction of native-*agricolaris* doing best (Figure 2c). These results indicate that native-  
180 *hayleyella* hosts are adapted to colonization by their field-acquired symbionts.

#### 181 **D. discoideum morphology and Burkholderia infected state**

182 We next examined host morphology and symbiont localization at several stages of the *D.*  
183 *discoideum* life cycle. Using transmission electronic and confocal microscopy, we  
184 examined one *D. discoideum* clone for each host type outlined above and in Figure 1  
185 (QS9 for the naïve, QS70 for the native-*agricolaris*, and QS11 for the native-*hayleyella*  
186 host). These were either in an uninfected state or infected with one representative of *B.*  
187 *agricolaris* (Ba70 from QS70) or of *B. hayleyella* (Bh11 from QS11).

### 188 ***Food bacteria location inside D. discoideum uninfected with Burkholderia***

189 *D. discoideum* morphology without *Burkholderia* in both naïve and cured native hosts,  
190 has vegetative cells that harbor no intracellular bacteria but contain many empty  
191 multilamellar bodies inside food vacuoles (Figure 3a and Supplemental figure S2).  
192 Confocal microscopy of vegetative amoebae from this same host set grown with GFP-  
193 labeled food bacteria (*K. pneumoniae*) contain little to no intracellular GFP, suggesting  
194 that they have digested food bacteria by the time of fixation (Figure 4a).

195 After bacterial food has been depleted, vegetative cells aggregate to form multicellular  
196 migratory slugs. In accordance with our observations that all bacteria were killed and  
197 digested by vegetative cells, we found no intact bacteria in naïve or cured native host  
198 slugs (Figure 5a). In addition, slug cells were in general compacted with electron dense  
199 materials and contained no food vacuoles or multi-lamellar bodies (Figure 5a).

200 Ultimately, slug cells differentiate into fruiting bodies consisting of dead stalk cells that  
201 support a sorus containing reproductive spore cells. In uninfected fruiting bodies, we did  
202 not detect bacteria in stalk cells or spores (Figure 6a and 7a). Instead spores were  
203 packed with electron dense materials with no food vacuoles or multi-lamellar bodies

204 (Figure 6a). Stalk cells showed plant cell-like characteristics, having a cellulosic cell wall  
205 and containing a single large vacuole (Figure 6a). Inside the large vacuole, there were  
206 some mitochondria and other cellular materials but no bacteria (Figure 6a). Taken  
207 together, these results suggest that the food bacterium we used, *Klebsiella pneumoniae*  
208 was efficiently cleared during the social cycle from amoebae uninfected by *Burkholderia*  
209 and the amoebae then aggregate and produce bacteria-free fruiting bodies.

### 210 ***Burkholderia* location inside *D. discoideum***

211 When *D. discoideum* is infected with *Burkholderia*, we find it in amoebae, slug cells,  
212 spores, and stalk cells. Using confocal microscopy and RFP labeled *Burkholderia*  
213 strains, we were able to specifically identify high levels of *Burkholderia* inside host  
214 amoebae (Figure 4b,c). *B. hayleyella* was present in more of the amoebae than *B.*  
215 *agricolaris* was (Figure 4b,c). The higher number of *B. hayleyella* bacteria may account  
216 for the more detrimental fitness consequences it imposes (Figure 2).

217 The food bacterium *K. pneumoniae* labelled with GFP was occasionally observed in  
218 *Burkholderia* infected amoebae, particularly those infected by *B. agricolaris* (Figures 4b,  
219 7b). This suggests that *Burkholderia* colonization may partially impede food digestion,  
220 thereby allowing co-colonization of secondary bacteria and contributing to the proto-  
221 farming phenotype (Brock et al., 2011; DiSalvo et al., 2015). However, confocal images  
222 demonstrate that *Burkholderia* is much more abundant in amoebae than is *K.*  
223 *pneumoniae*, allowing us to infer that the majority of intact intracellular bacteria observed  
224 via transmission electron microscopy (TEM) are most likely *Burkholderia* cells (Figures 3,  
225 5, 6).

226 TEM of vegetative amoebae shows intact bacteria which we infer to be *Burkholderia*  
227 surrounded by multi-lamellar bodies and located inside what appear to be food vacuoles  
228 (Figure 3b,c). Their undamaged appearance suggests that they are resistant to  
229 phagocytic digestion. In addition to the presence of intact intracellular bacteria, we also  
230 observe empty multi-lamellar bodies inside food vacuoles of infected amoebae. This  
231 suggests that digestion is not completely arrested during colonization, an unsurprising  
232 finding given that hosts continue to grow and multiply. Interestingly, we did not find multi-  
233 lamellar bodies containing intact bacteria secreted into the extracellular environment,  
234 indicating that *Burkholderia* may not be expelled from host cells via multi-lamellar body  
235 excretion.

236 In *Burkholderia* infected hosts, intact bacteria are retained in food vacuoles throughout  
237 the transition to multicellular slugs, suggesting that bacteria stay within phagosomes  
238 throughout the aggregation stage (Figure 5b,c). Through TEM, we did not detect obvious  
239 morphological defects in infected slugs or differences between slugs infected with  
240 different *Burkholderia* species.

241 After fruiting body development, we find intracellular bacteria in both stalk and spore  
242 cells of *Burkholderia* infected hosts (Figure 6b,c). In infected stalk cells, intact bacteria  
243 reside in single large vacuoles inside the cellulosic cell wall (Figure 6b,c). In spore cells,  
244 bacteria remain within vacuoles (Figure 6b,c). We also observed bacterial cells outside  
245 spores but within the sorus, suggesting that bacteria can either travel extracellularly into  
246 the sorus or escape from spores after sorus formation (Figure 7b,c).

247 We did not observe strikingly altered morphologies for *B. agricolaris* infected spore and  
248 stalk cells (Figure 6b). However, the spore and stalk cells of naïve hosts infected with *B.*  
249 *hayleyella* appeared to be morphologically aberrant (Figure 6b). We found numerous  
250 broken spores and signs that bacterial cells were escaping from damaged spores (Figure  
251 6b). In addition, the whole stalk structure was often collapsed and filled with bacteria  
252 (Figure 6b). No clear cellulosic cell wall was observed in stalk cells, suggesting that *B.*  
253 *hayleyella* colonization inhibits the normal development of stalk cells or results in their  
254 disruption in naïve hosts and native-*agricolaris* hosts.

255 In line with the visualized differences between the abundance of the two species of  
256 *Burkholderia* in amoebae, we find significantly more naïve spores infected with RFP  
257 labeled *B. hayleyella* (mean= 88.8%) than similarly labeled *B. agricolaris* (mean= 35.3%)  
258 ( $F_{2,4} = 191.33$ ,  $P < 0.001$ ) (Figure 7d). These results indicate that the degree of fitness  
259 detriment imposed by *B. hayleyella* could be a result of bacterial density.

### 260 ***Burkholderia* impact on fruiting body morphology**

261 Since *Burkholderia* are found inside *D. discoideum*, it is no surprise they impact the  
262 morphology of fruiting bodies. In their field-collected state, the three clones carrying no  
263 *Burkholderia*, or *B. agricolaris* or *B. hayleyella* differed in both stalk height and stalk  
264 volume ( $F_{2,27} = 42.6$ ,  $P \ll 0.001$ ,  $F_{2,27} = 50.8$ ,  $P \ll 0.001$ , Figure 8b, Table S3a). The  
265 main pattern is that both height and volume were significantly lower in native-*hayleyella*  
266 hosts (Fig. 8; Table S3a).

267 Native-*agricolaris* fruiting bodies were generally similar to the naïve host but taller than  
268 the native-*hayleyella* host ( $P < 0.001$ ). In the native-*agricolaris* host, the spore masses

269 often slid down their stalks or the fruiting bodies fell over, though the stalks were not  
270 significantly taller than in the naïve host. If the spores fall off their stalks, they will not  
271 have the advantage of facilitated transport by a vector that they would have at the top of  
272 the stalk (smith et al., 2014).

273 There was also an overall difference in sorus diameter and sorus volume among the  
274 three hosts in their field state (Figure 8;  $F_{2,236} = 25.4$ ,  $P \ll 0.001$ ,  $F_{2,236} = 22.9$ ,  $P \ll$   
275  $0.001$ , Table S4a). Compared to the naïve hosts, both the native-*agricolaris* and native-  
276 *hayleyella* hosts had smaller sorus sizes (both  $P < 0.001$ ) but were not different from  
277 each other.

278 Curing with antibiotics caused no significant change in any stalk or spore measurements  
279 (Figure 8a, b, c; Table S3b, S4b). However, when *Burkholderia* bacteria were added to  
280 the cured hosts, we saw species-specific effects on morphology (Figure 8; Table S3c-d,  
281 S4c-d). Overall, the addition of *B. agricolaris* changed stalk height ( $F_{1,58} = 54.9$ ,  $P \ll$   
282  $0.001$ ) significantly increasing it in two of the hosts (Table S3c). Stalk volume was not  
283 affected. Addition of *B. agricolaris* also significantly changed both sorus diameter and  
284 sorus volume ( $F_{2,240} = 25.4$ ,  $P \ll 0.001$ ,  $F_{2,240} = 21.2$ ,  $P \ll 0.001$ ). Native-*hayleyella* hosts  
285 had larger sori when infected with *B. agricolaris* (Figure 8; Table S4c).

286 The addition of *B. hayleyella* decreased both stalk height (Figure 8;  $F_{1,58} = 366.4$ ,  $P \ll$   
287  $0.001$ ) and stalk volume ( $F_{1,58} = 120.2$ ,  $P \ll 0.001$ , Table S3d) significantly in all three  
288 hosts. Addition of *B. hayleyella* also affected sorus diameter ( $F_{2,240} = 10.1$ ,  $P \ll 0.001$ )  
289 and volume ( $F_{2,240} = 11.3$ ,  $P \ll 0.001$ ) with a significant specific effect of smaller sori in  
290 the naïve host (Figure 8; Table S4d).

291 There were interaction effects between the amoebae hosts' native infection status and  
292 the species of *Burkholderia* added for all traits: stalk height ( $F_{4,81} = 4.9$ ,  $P = 0.0015$ ), stalk  
293 volume ( $F_{4,81} = 7.4$ ,  $P \ll 0.001$ ; Figure 8; Table S3e), sorus diameter ( $F_{4,719} = 5.3$ ,  $P =$   
294  $0.0004$ ) and sorus volume ( $F_{4,719} = 4.5$ ,  $P = 0.0014$ ; Figure 8; Table S4e). However,  
295 these interactions were matters of degree of change and did not involve sign changes:  
296 for all four measurements, fruiting bodies with *B. agricolaris* were taller than those with *B.*  
297 *hayleyella* (Figure 8; Tables S3e, S4e).

## 298 **DISCUSSION**

299 Here, we characterized *D. discoideum* infection by two symbiotic *Burkholderia* species,  
300 *B. hayleyella* and *B. agricolaris* (Brock et al., 2018). We looked at their impact on *D.*  
301 *discoideum* by comparing wild type, cured, and re-infected hosts. We assessed fitness  
302 measured as production of viable spores, and also evaluated morphological changes in  
303 amoebae, slugs, and fruiting bodies with numerical and microscopic data. We found that  
304 both *Burkholderia* species are a burden to *D. discoideum* under our experimental  
305 conditions. However, wild collected hosts did not differ in viable spore production  
306 according to whether or not they carried either species of *Burkholderia*. Even so, *D.*  
307 *discoideum* with their field-collected state of infection did differ in fruiting body  
308 dimensions, with uninfected hosts generally having taller, larger stalks, and larger sori.  
309 What explains the differences from experimental infection is unclear. Infection in the wild  
310 may be at a lower level than we used experimentally or may have initiated at a lower  
311 level that slowly amplified over time, allowing host acclimation to the metabolic costs of  
312 infection.

313 Once *D. discoideum* hosts are cured with antibiotics, so all comparisons can start from  
314 the same baseline, we found that there were few within treatment differences according  
315 to host type. The only exception to this is that native-*hayleyella* hosts produced more  
316 viable spores than did naïve or native-*agricolaris* hosts. This fitness difference is an  
317 indication of co-adaptation.

318 Perhaps the general lack of difference among host types with infection is due to sex,  
319 which not only recombines genes, but also exposes new clones horizontally to  
320 endosymbionts like *Burkholderia*. *Dictyostelium* recombination rates are high in natural  
321 populations (Flowers et al., 2010). The differences reported here among clones of *D.*  
322 *discoideum* indicate that the sexual stage has not particularly disrupted specific co-  
323 adaptation in clones infected with *B. hayleyella*. Thus reproduction by binary fission and  
324 vertical transmission of *B. hayleyella* is likely to occur much more often than sexual  
325 reproduction which would result in horizontal transmission.

326 Our previous work demonstrated that *Burkholderia* infections have contextually  
327 dependent costs and benefits for their hosts. In food abundant conditions (which we  
328 used here) *Burkholderia* infections are generally detrimental to host fitness (Brock et al  
329 2011). However, when dispersed to food scarce conditions, *Burkholderia* infected hosts  
330 are able to transport food bacteria with them which restocks their food source and results  
331 in higher host fitness (“farming”). These fitness outcomes may result from the ongoing  
332 power play underlying long-term symbiosis.

333 A compelling question is what mediates this tolerance to *B. hayleyella* infection in its  
334 native host? It is possible that native hosts better inhibit infection events or better control



335 intracellular replication of symbiont cells. The percent of spore cells infected in the  
336 population post symbiont exposure are not significantly different between a native-  
337 *hayleyella* host and naïve hosts, which does not support the idea that infection events  
338 are inhibited. However, our TEM analysis qualitatively points to the idea that after  
339 infection, intracellular replication rates may differ between naïve and native-*hayleyella*  
340 hosts. TEM images of native and naïve *B. hayleyella* hosts consistently suggest a higher  
341 load of intracellular bacterial cells at each stage. For instance, naïve *B. hayleyella* hosts  
342 produce paltry stalks that appear overwhelmed by bacterial cells and infected spore cells  
343 that look on the verge of deteriorating. Neither of these extreme states were observed in  
344 the native host. This could be mediated by host countermeasures that control  
345 intracellular symbiont growth or disarm potential toxic symbiont byproducts.

346 Compared to *B. hayleyella*, *B. agriculturalis* infections result in more modest (and  
347 statistically insignificant) drops in *D. discoideum* viable spore production for naïve and  
348 cured re-infected native-*agriculturalis* hosts. In line with *B. agriculturalis* being less invasive to  
349 the host population it also appears in only about a quarter of spores after exposure.  
350 Despite this, it is maintained in infected population of cells throughout the social stage  
351 and over multiple social cycles (DiSalvo et al., 2015).

352 Earlier studies have identified other differences between naïve *D. discoideum* and those  
353 carrying *B. hayleyella* (Brock et al., 2013, 2016b; Stallforth et al., 2013). *D. discoideum*  
354 hosts carrying *B. hayleyella* harmed symbiont-free *D. discoideum* clones, causing them  
355 to lose in social competition (Brock et al. 2013). In another study we compared cured  
356 and uncured clones of *B. hayleyella* and found that slugs from uncured clones move less  
357 far across a Petri plate, a cost of infection (Brock et al. 2015). Interestingly, in the current

358 study we detected no visible differences between cured and uncured slug cells. The  
359 recent discovery of sentinel cells as innate immune cells (Chen et al. 2007) made us  
360 wonder about how they fare with *Burkholderia* infected hosts. We found that *D.*  
361 *discoideum* hosts with *Burkholderia* do not produce as many sentinel cells but even so  
362 seem as resistant to toxins as uninfected lines with normal levels of sentinel cells (Brock  
363 et al., 2016).

364 Another interesting recent result on the interaction between *D. discoideum* and bacteria  
365 involves the role of the lectin discoidin 1 (Dinh et al., 2018). Clones infected with  
366 *Burkholderia* produced much greater quantities of lectins early in the social stage  
367 compared to uninfected clones. These lectins coated the food bacterium *K. pneumoniae*  
368 allowing it to avoid digestion. This is undoubtedly just a beginning, though a fascinating  
369 one, in our understanding of how *Burkholderia* take over *D. discoideum* cellular  
370 machinery to change relationships with bacteria.

371 *D. discoideum* is already a popular system for examining the molecular mechanisms of  
372 bacterial pathogenesis for a variety of important pathogens (Cosson and Soldati, 2008).  
373 However, the *D. discoideum-Burkholderia* system holds unique potential for studying  
374 eukaryote-bacterial associations. Given its natural occurrence, we can perform long-term  
375 ecological surveys, easily isolate new host-symbiont pairs, investigate naturally derived  
376 vs newly induced associations using a variety of partner pairing, and we can do  
377 experiments in evolution allowing each partner to evolve together or separately.

378 In addition, this work demonstrates several properties of this interaction that are distinct  
379 from other bacterial associations, possibly owing to its natural prevalence. For instance,

380 *Bordetella bronchiseptica* can intracellularly infect vegetative *D. discoideum* amoebae  
381 and persist in sorus contents. However, in contrast to *Burkholderia*, *B. bronchiseptica* is  
382 localized extracellularly in sori rather than inside spore cells (Taylor-Mulneix et al., 2017).  
383 Infections of *D. discoideum* with other intracellular pathogens such as *Legionella*  
384 *pneumophila* often produce secreted multi-lamellar bodies which harbor the bacterial  
385 pathogen (Denoncourt et al., 2014; Paquet and Charette, 2016), while in this study we  
386 found no evidence of *Burkholderia* excreted in multi-lamellar bodies. In addition, many  
387 bacteria resistant to amoebae are found packaged in multi-lamellar bodies, a process  
388 speculated to enhance their resistance to environmental stress. Thus, *Burkholderia*  
389 symbionts are most likely employing alternative tactics to not only evade digestion, but to  
390 also evade expulsion.

391 *Burkholderia* is important in another model symbiosis system, that with the bean bug,  
392 *Riptortus pedestris* (Takeshita and Kikuchi, 2017). These bugs acquire *Burkholderia*  
393 *insecticola* horizontally. They reside in the bean bug gut where they are presumably  
394 active in nutrition. They are a good model because it is a facultative symbiosis and both  
395 partners can be cultured independently.

396 This is a new age of symbiosis studies where we can apply Koch's principles of curing,  
397 re-infecting, and looking for evidence of disease. We can use genomics, experimental  
398 evolution and many other methods to ever more systems. In time, *B. hayleyella* and *B.*  
399 *agricolaris* in *D. discoideum* may be added to the classic symbioses of squid-vibrio,  
400 aphid-*Buchnera*, tsetse fly-*Wiggelsworthia*, legume-*Rhizobia* and more (Bennett and  
401 Moran, 2015; Bing et al., 2017; Koehler et al., 2018; Werner et al., 2015).

## 402 **MATERIALS AND METHODS**

### 403 ***D. discoideum* strains and culture conditions**

404 We collected *D. discoideum* isolates from the field that were uninfected, or infected with  
405 either *B. agricolaris*, or *B. hayleyella*. Table 1 describes host clone sets, location  
406 collected, and infection status. We used host sets 1-4 for the spore fitness assays and  
407 set 1 for all other experiments. We used *Klebsiella pneumoniae* obtained from the Dicty  
408 Stock Center (<http://dictybase.org/StockCenter/StockCenter.html>) as our food bacterium  
409 for *D. discoideum*. We grew all *D. discoideum* from spores on SM/5 agar plates (2 g  
410 glucose, 2 g BactoPeptone (Oxoid), 2 g yeast extract (Oxoid), 0.2 g MgCl<sub>2</sub>, 1.9 g  
411 KH<sub>2</sub>PO<sub>4</sub>, 1 g K<sub>2</sub>HPO<sub>4</sub> and 15.5 g agar per liter) supplemented with *K. pneumoniae* at  
412 room temperature (21°C).

### 413 **Symbiotic bacterial strains**

414 We used *D. discoideum*-associated *Burkholderia* previously isolated and sequenced to  
415 verify closest 16S identity (Brock et al., 2011; DiSalvo et al., 2015). *B. agricolaris* and *B.*  
416 *hayleyella* strains were isolated from QS70, QS159, QS161, and NC21, and QS11,  
417 QS23, QS22, and QS21 *D. discoideum* hosts respectively.

### 418 **Removal of symbiont from native *D. discoideum* hosts**

419 We generated symbiont-free native host clones by tetracycline, or by ampicillin-  
420 streptomycin, treatment as previously described (Brock et al., 2011; DiSalvo et al.,  
421 2015). We confirmed loss of infection status using the spot test assay and PCR analysis  
422 of *Burkholderia*, and *K. pneumoniae* in *D. discoideum* sori as previously described.

423 **Lab Infections**

424 We collected stationary phase bacteria in starvation buffer from bacteria grown on SM/5  
425 plates. We determined the bacterial absorbance ( $A_{600}$ ) using a BioPhotometer  
426 (Eppendorf, NY) and set all suspensions to optical density ( $OD_{600}$  1.5). For experiments  
427 using lab-infected lines, we mixed the specified *Burkholderia* species at 5% and *K.*  
428 *pneumoniae* at 95% volume and plated *D. discoideum* spores (as indicated) with 200ul  
429 of the bacterial mixture on SM/5 plates.

430 **Spot test assay**

431 We verified infection status by spot test assay as previously described (Brock et al.,  
432 2011). Briefly, we transferred sorus contents from individual *D. discoideum* fruiting  
433 bodies to SM/5 agar plates using a 10ul filter pipet tip. We incubated at 21°C for one  
434 week and checked for bacterial growth as an indication of infection.

435 **Fitness assay**

436 We analyzed spore production and viability as a proxy for amoeba fitness using four sets  
437 of *D. discoideum* clones (Table 1). We tested three conditions: uninfected (naïve, cured  
438 naïve, cured native-*agricolaris*, and cured native-*hayleyella*), *B. agricolaris* infected  
439 (native-*agricolaris*, and naïve, native-*agricolaris*, and native-*hayleyella* first cured then  
440 infected with *B. agricolaris*) and *B. hayleyella* infected (native-*hayleyella*, and naïve,  
441 native-*agricolaris*, and native-*hayleyella* first cured then infected with *B. hayleyella*)  
442 across three temporal replicates.

443 To set up each assay, we plated  $2 \times 10^5$  spores of each clone in each condition (with  
444 lab infected lines being plated on *Burkholderia-Klebsiella* mixtures as described) onto  
445 SM/5 agar plates in duplicate. All clones formed fruiting bodies by 3 days, so we  
446 performed data collection five days after fruiting. We used the first plate to ascertain  
447 total spore production as previously described (DiSalvo et al., 2015). Briefly, spores  
448 were collected by washing plates with starvation buffer supplemented with 0.01% NP-  
449 40 alternative (Calbiochem). We counted spore dilutions on a hemocytometer using a  
450 light microscope and determined total spores according to total volume collected and  
451 dilution factor. To determine the proportion of viable spores we collected spores into  
452 starvation buffer only and determined spore density as above. We diluted suspensions  
453 to  $10^4$  and spread 100 spores over ten  $100 \times 15 \text{ mm}^2$  Sm/5 agar plates supplemented  
454 with 200  $\mu\text{L}$  *K. pneumoniae* in starvation buffer (absorbance,  $A_{600}$  1.5). After 2 days the  
455 percentage of viable spores was determined by counting plaques formed on bacterial  
456 lawns.

#### 457 **Transmission electron microscopy**

458 We prepared amoebae by plating  $2 \times 10^5$  spores (with *Klebsiella* for uninfected or native-  
459 infected and for the indicated *Burkholderia* mixture for lab-infected). We harvested log-  
460 phase vegetative cells approximately 36hrs after plating and fruiting bodies 4 days after  
461 plating. To prepare migrating slugs, we mixed 200  $\mu\text{L}$  of centrifuge-concentrated *K.*  
462 *pneumoniae* (absorbance,  $A_{600}$  75) with  $5 \times 10^6$  spores and plated the mixture in a  
463 straight line across a starving agar plate, which was then wrapped in aluminum foil with a  
464 small hole opposite the spore line. We incubated plates under a direct light and allowed  
465 slugs to migrate for about 80 hours before processing. We processed all stages by first

466 adding fix solution (2% paraformaldehyde/2.5% glutaraldehyde (Polysciences Inc.,  
467 Warrington, PA) in 100 mM cacodylate buffer, pH 7.2), followed by low melting agarose,  
468 over the plates to keep structures intact.

469 We fixed samples for 1-3 hr at room temperature then washed with cacodylate buffer  
470 and postfixed in 1% osmium tetroxide (Polysciences Inc.) for 1 hr. We then rinsed  
471 samples extensively in dH<sub>2</sub>O prior to *en bloc* staining with 1% aqueous uranyl acetate  
472 (Ted Pella Inc., Redding, CA) for 1 hr. Following several rinses in dH<sub>2</sub>O, we dehydrated  
473 samples in a graded series of ethanol and embedded them in Eponate 12 resin (Ted  
474 Pella Inc.). Sections of 95 nm were cut with a Leica Ultracut UCT ultramicrotome (Leica  
475 Microsystems Inc., Bannockburn, IL), stained with uranyl acetate and lead citrate, and  
476 viewed on a JEOL 1200 EX transmission electron microscope (JEOL USA Inc.,  
477 Peabody, MA) equipped with an AMT 8 megapixel digital camera (Advanced Microscopy  
478 Techniques, Woburn, MA).

### 479 **Confocal microscopy**

480 We constructed RFP labeled versions of *B. agricolaris* (from QS70) and *B. hayleyella*  
481 (from QS11) by performing triparental mating procedures with the *E. coli* helper strain  
482 E1354 (pTNS3-asdEc) and the *E. coli* donor strain E2072 with pmini-Tn7-gat-P1-rfp and  
483 confirmed glyphosate resistant RFP positive *Burkholderia* conjugants using *Burkholderia*  
484 specific PCR as previously described (DiSalvo et al., 2015; Norris et al., 2009; Su et al.,  
485 2014). We constructed a GFP labeled version of *K. pneumoniae* using a triparental  
486 mating strategy with the donor *E. coli* donor strain WM3064 containing pmini-Tn7-KS-  
487 GFP and the *E. coli* helper strain E1354 helper pUXBF13 as previously described

488 (Kikuchi and Fukatsu, 2014). We confirmed kanamycin resistant GFP positive recipient  
489 cells by 16s rRNA gene sequencing.

490 Using *Burkholderia*-RFP and *Klebsiella*-GFP we infected set 1 hosts (using cured native  
491 hosts) as previously described. Control samples were plated with *K. pneumoniae*-GFP  
492 only. We harvested log-phase amoebae approximately 36 hrs after plating by flooding  
493 plates with 5ml SorMC and washing 3x in PBS to remove residual bacteria. We set  
494 amoebae to  $1 \times 10^6$  cells/ml and placed 200 $\mu$ l onto #1.5 glass coverslips for 15min to  
495 allow them to adhere before fixing in 4% formaldehyde for 10min. We then washed with  
496 PBS, permeabilized with 0.5% triton-X, and stained with Alexa Fluor® 680 phalloidin  
497 (lifetechnologies) for 30 min before mounting in Prolong® Diamond antifade mountant  
498 (lifetechnologies). We prepared spores four days after plating by collecting sori into  
499 starving buffer with 1% calcofluor white and spreading the solution on a glass bottom  
500 culture dish under a 2% agarose overly.

501 We collected images using a Nikon A1Si Laser Scanning confocal microscope with a CFI  
502 Plan Apo VC Oil 1.4 NA 100X objective and Nikon Elements software or an Olympus  
503 Fluoview FV1000 confocal microscope using Plan Apo Oil 1.4NA 60X objective and  
504 Olympus software. Z-sections were taken every 0.5 microns with an average of 2 at  
505 1024 x 1024 resolution pixels or 600 x 600 pixels. We excited RFP using the 561 laser,  
506 GFP with the 488 laser, Calcofluor-white with the 408 laser, and Alexa Fluor 680  
507 Phalloidin with the 640 laser. We created composite images in FIJI.

## 508 **Infectivity Quantification**



509 We quantified the population of *Burkholderia*-RFP infected spores for the set 1 clones  
510 using the BD accuri C6 flow cytometer. We plated spores in duplicate as described in the  
511 confocal microscopy section. Four days after plating, we resuspended 3 sori from each  
512 plate into 500ul of starving buffer with 0.01% NP-40 alternative. We ran 100  $\mu$ l of each  
513 vortexed sample through the flow cytometer. We used non-fluorescent controls to  
514 establish an accurate gating between fluorescent and non-fluorescent boundaries. We  
515 measured and averaged duplicates for a total of 6 temporal replicates.

### 516 **Morphometrics**

517 We quantified fruiting body size and shape for each clone in each condition using set 1  
518 clones. We plated the clones as described under fitness assays. Five days after fruiting,  
519 we carefully cut and removed a thin strip of agar approximately 5 mm wide from the  
520 central area of an experimental plate and laid it on its side in a Petri plate. We placed  
521 dampened Kimwipes around the agar slice to prevent desiccation. We used a Leica EC3  
522 scope with the LASD core package (LAS V4.1) to collect data. Fruiting body images were  
523 taken randomly along with graticule images for calibration. We took six measurements of  
524 each fruiting body: sorus width, sorus length, stalk height and the width of the stalk at its  
525 base, midpoint and at the top just below the sorus (Buttery et al., 2009). Stalk height was  
526 measured from the base of stalk to the tip of the sorus. We calculated sorus volume  
527 applying the formula for the volume of a sphere using diameter,  $V = 1/6 \pi d^3$ . We  
528 calculated stalk volume using the formula of a cylinder,  $V = \pi r^2 h$ , where height (h) is the  
529 stalk height and radius (r) is half the mean of the three stalk width measurements. We  
530 measured about 80 sori and 20 stalks for each clone for each condition.

## 531 **Statistical analyses**

532 All analyses were done in R. For fitness assays, we tested the effect of antibiotic  
533 treatment using random-slope linear mixed models (LMM) on those *D. discoideum* hosts  
534 not reinfected with *Burkholderia*. Our models included either spore numbers or  
535 proportion of viability as the response variable, host as random effect, and antibiotic  
536 treatment as a fixed effect. We similarly tested the effects of *Burkholderia* infection in the  
537 field and in the lab using random-slope LMMs on data from hosts cured with antibiotics.  
538 Our models included spore numbers or proportion viability as response variable, host as  
539 random effect, lab or field-infection status and *Burkholderia* type as fixed effects, as well  
540 as an interaction between field-infection status and *Burkholderia* infection. For all LMMs,  
541 we fitted models and assessed model fit with likelihood ratio tests executed with the lme4  
542 package (Bates et al., 2015) in the R environment (v. 3.3.3, R Core Team 2017). We  
543 tested the significance of fixed effects with Wald tests using the *t* distribution, which we  
544 executed with the packager lmerTest (Kuznetsova et al., 2017). These tests use  
545 (Satterthwaite, 1946) approximation for denominator degrees of freedom to calculate *p*-  
546 values. Finally, for all *post hoc* multiple comparisons, we performed pairwise contrasts of  
547 least-square means with a multivariate *t* distribution adjustment as implemented with the  
548 package lsmeans (Lenth, 2016).

549 For morphometric analyses, we also tested the effect of antibiotic treatment on those  
550 hosts not re-infected with *Burkholderia*. We used a 2-way analysis of variance (ANOVA)  
551 with one of our four morphological measurements as the response variable and both  
552 *Burkholderia* colonization and antibiotic treatment as fixed effects. Similarly, we tested  
553 the effects of *Burkholderia* colonization from the field and *Burkholderia* infection in the

554 lab on the amoeba hosts with 2-way ANOVAs on amoebae cured with antibiotics. Again,  
555 one of the four morphological measurements was the response variable with field-  
556 colonization status, *Burkholderia* infection, and an interaction between them as fixed  
557 effects. For all ANOVAs, when appropriate, we performed *post hoc* Tukey HSD tests for  
558 multiple comparisons. Sorus width data were square-root transformed as  $\sqrt{x + 2}$  and  
559 sorus volume data were  $\log_e$ -transformed to meet test assumptions of normally  
560 distributed residuals.

561 We analyzed *Burkholderia* infectivity in the spore population with a 2-way ANOVA,  
562 followed by a Tukey HSD for multiple comparisons. We treated *Burkholderia* species and  
563 *D. discoideum* host identity as fixed effects.

#### 564 **Contributions**

565 Conception and planning: DAB, SD, DCQ, LS, JES

566 Experiments: DAB, SD, JM, LS

567 Manuscript: SD, DCQ, JES

568 Statistical analyses: SD, KG, DCQ

#### 569 **Acknowledgements**

570 Many thanks to the Strassmann/Queller laboratory group for useful discussion and  
571 Mountain Lake Biological Station where we collected the samples. Thanks to Kyle  
572 Skottke, Hassan Salem, and Tyler Larsen for helpful comments on the manuscript. All  
573 authors read and approved the final manuscript.

574 This material is based upon work supported by the National Science Foundation under  
575 grant nos. NSF DEB1146375, NSF IOS 1256416, NSF IOS 1656756, the Life Sciences  
576 Research Foundation and Simons Foundation (to L.S.), and the John Templeton  
577 Foundation grant no. 43667.

## 578 **Conflicts of interest**

579 The authors declare no conflicts of interest.

## 580 **References**

- 581 Bates, D., Mächler, M., Bolker, B., and Walker, S. (2015). Fitting Linear Mixed-Effects Models  
582 Using **lme4**. *J. Stat. Softw.* *67*.
- 583 Bennett, G.M., and Moran, N.A. (2015). Heritable symbiosis: The advantages and perils of an  
584 evolutionary rabbit hole. *Proc. Natl. Acad. Sci.* *112*, 10169–10176.
- 585 Bing, X., Attardo, G.M., Vigneron, A., Aksoy, E., Scolari, F., Malacrida, A., Weiss, B.L., and  
586 Aksoy, S. (2017). Unravelling the relationship between the tsetse fly and its obligate symbiont  
587 *Wigglesworthia* : transcriptomic and metabolomic landscapes reveal highly integrated  
588 physiological networks. *Proc. R. Soc. B Biol. Sci.* *284*, 20170360.
- 589 Bloomfield, G., Skelton, J., Ivens, A., Tanaka, Y., and Kay, R.R. (2010). Sex Determination in the  
590 Social Amoeba *Dictyostelium discoideum*. *Science* *330*, 1533–1536.
- 591 Brock, D.A., Douglas, T.E., Queller, D.C., and Strassmann, J.E. (2011). Primitive agriculture in a  
592 social amoeba. *Nature* *469*, 393–396.
- 593 Brock, D.A., Read, S., Bozhchenko, A., Queller, D.C., and Strassmann, J.E. (2013). Social  
594 amoeba farmers carry defensive symbionts to protect and privatize their crops. *Nat. Commun.* *4*.
- 595 Brock, D.A., Jones, K., Queller, D.C., and Strassmann, J.E. (2016a). Which phenotypic traits of  
596 *Dictyostelium discoideum* farmers are conferred by their bacterial symbionts? *Symbiosis* *68*, 39–  
597 48.
- 598 Brock, D.A., Callison, W.É., Strassmann, J.E., and Queller, D.C. (2016b). Sentinel cells,  
599 symbiotic bacteria and toxin resistance in the social amoeba *Dictyostelium discoideum*. *Proc.*  
600 *Biol. Sci.* *283*.
- 601 Brock, D.A., Hubert, A.M., Noh, S., DiSalvo, S., Geist, K.S., Haselkorn, T.S., Queller, D., and  
602 Strassmann, J.E. (2018). Endosymbiotic adaptations in three new bacterial species associated  
603 with *Dictyostelium discoideum*: *Burkholderia agricolaris* sp. nov., *Burkholderia hayleyella* sp.  
604 nov., and *Burkholderia bonniea* sp. nov.

- 605 Buttery, N.J., Rozen, D.E., Wolf, J.B., and Thompson, C.R.L. (2009). Quantification of social  
606 behavior in *D. discoideum* reveals complex fixed and facultative strategies. *Curr. Biol. CB* *19*,  
607 1373–1377.
- 608 Casadevall, A. (2008). Evolution of Intracellular Pathogens. *Annu. Rev. Microbiol.* *62*, 19–33.
- 609 Chen, G., Zhuchenko, O., and Kuspa, A. (2007). Immune-like Phagocyte Activity in the Social  
610 Amoeba. *Science* *317*, 678–681.
- 611 Cosson, P., and Lima, W.C. (2014). Intracellular killing of bacteria: is *D. dictyostelium* a model  
612 macrophage or an alien?: Intracellular bacterial killing in *Dictyostelium*. *Cell. Microbiol.* *16*, 816–  
613 823.
- 614 Dale, C., and Moran, N.A. (2006). Molecular interactions between bacterial symbionts and their  
615 hosts. *Cell* *126*, 453–465.
- 616 Denoncourt, A.M., Paquet, V.E., and Charette, S.J. (2014). Potential role of bacteria packaging  
617 by protozoa in the persistence and transmission of pathogenic bacteria. *Front. Microbiol.* *5*.
- 618 Dinh, C., Farinholt, T., Hirose, S., Zhuchenko, O., and Kuspa, A. (2018). Lectins modulate the  
619 microbiota of social amoebae. *Science* *361*, 402–406.
- 620 DiSalvo, S., Haselkorn, T.S., Bashir, U., Jimenez, D., Brock, D.A., Queller, D.C., and  
621 Strassmann, J.E. (2015). Burkholderia bacteria infectiousy induce the proto-farming symbiosis of  
622 *Dictyostelium* amoebae and food bacteria. *Proc. Natl. Acad. Sci. U. S. A.* *112*, E5029-5037.
- 623 Douglas, A.E. (2008). Conflict, cheats and the persistence of symbioses. *New Phytol.* *177*, 849–  
624 858.
- 625 Douglas, A.E. (2009). The microbial dimension in insect nutritional ecology. *Funct. Ecol.* *23*, 38–  
626 47.
- 627 Estrela, S., Kerr, B., and Morris, J.J. (2016). Transitions in individuality through symbiosis. *Curr.*  
628 *Opin. Microbiol.* *31*, 191–198.
- 629 Ferdy, J., and Godelle, B. (2005). Diversification of Transmission Modes and the Evolution of  
630 Mutualism. *Am. Nat.* *166*, 613–627.
- 631 Flowers, J.M., Li, S.I., Stathos, A., Saxer, G., Ostrowski, E.A., Queller, D.C., Strassmann, J.E.,  
632 and Purugganan, M.D. (2010). Variation, Sex, and Social Cooperation: Molecular Population  
633 Genetics of the Social Amoeba *Dictyostelium discoideum*. *PLoS Genet.* *6*, e1001013.
- 634 Garcia, J.R., and Gerardo, N.M. (2014). The symbiont side of symbiosis: do microbes really  
635 benefit? *Front. Microbiol.* *5*.
- 636 Hosokawa, T., Ishii, Y., Nikoh, N., Fujie, M., Satoh, N., and Fukatsu, T. (2016). Obligate bacterial  
637 mutualists evolving from environmental bacteria in natural insect populations. *Nat. Microbiol.* *1*,  
638 15011.
- 639 Kessin, R.H. (2001). *Dictyostelium: evolution, cell biology, and the development of multicellularity*  
640 (Cambridge, UK ; New York: Cambridge University Press).

- 641 Kikuchi, Y., and Fukatsu, T. (2014). Live imaging of symbiosis: spatiotemporal infection  
642 dynamics of a GFP-labelled *Burkholderia* symbiont in the bean bug *Riptortus pedestris*. *Mol.*  
643 *Ecol.* **23**, 1445–1456.
- 644 Koehler, S., Gaedeke, R., Thompson, C., Bongrand, C., Visick, K.L., Ruby, E., and McFall-Ngai,  
645 M. (2018). The model squid-vibrio symbiosis provides a window into the impact of strain- and  
646 species-level differences during the initial stages of symbiont engagement: Strain variation  
647 impacts symbiont engagement. *Environ. Microbiol.*
- 648 Kuznetsova, A., Brockhoff, P.B., and Christensen, R.H.B. (2017). lmerTest Package: Tests in  
649 Linear Mixed Effects Models. *J. Stat. Softw.* **82**.
- 650 Lenth, R.V. (2016). Least-Squares Means: The R Package **lsmeans**. *J. Stat. Softw.* **69**.
- 651 Leung, T.L.F., and Poulin, R. (2008). Parasitism, commensalism, and mutualism: exploring the  
652 many shades of symbiosis. *Life Environ.* **2**, 107–115.
- 653 Lowe, C.D., Minter, E.J., Cameron, D.D., and Brockhurst, M.A. (2016). Shining a Light on  
654 Exploitative Host Control in a Photosynthetic Endosymbiosis. *Curr. Biol.* **26**, 207–211.
- 655 McCutcheon, J.P., and Moran, N.A. (2011). Extreme genome reduction in symbiotic bacteria.  
656 *Nat. Rev. Microbiol.* **10**, 13–26.
- 657 McFall-Ngai, M., Hadfield, M.G., Bosch, T.C.G., Carey, H.V., Domazet-Lošo, T., Douglas, A.E.,  
658 Dubilier, N., Eberl, G., Fukami, T., Gilbert, S.F., et al. (2013). Animals in a bacterial world, a new  
659 imperative for the life sciences. *Proc. Natl. Acad. Sci. U. S. A.* **110**, 3229–3236.
- 660 Moran, N.A. (2007). Symbiosis as an adaptive process and source of phenotypic complexity.  
661 *Proc. Natl. Acad. Sci. U. S. A.* **104 Suppl 1**, 8627–8633.
- 662 Moran, N.A., Munson, M.A., Baumann, P., and Ishikawa, H. (1993). A Molecular Clock in  
663 Endosymbiotic Bacteria is Calibrated Using the Insect Hosts. *Proc. R. Soc. B Biol. Sci.* **253**, 167–  
664 171.
- 665 Norris, M.H., Kang, Y., Lu, D., Wilcox, B.A., and Hoang, T.T. (2009). Glyphosate Resistance as a  
666 Novel Select-Agent-Compliant, Non-Antibiotic-Selectable Marker in Chromosomal Mutagenesis  
667 of the Essential Genes *asd* and *dapB* of *Burkholderia pseudomallei*. *Appl. Environ. Microbiol.* **75**,  
668 6062–6075.
- 669 Nyholm, S.V., and McFall-Ngai, M. (2004). The winnowing: establishing the squid–vibrio  
670 symbiosis. *Nat. Rev. Microbiol.* **2**, 632–642.
- 671 Oliver, K.M., Russell, J.A., Moran, N.A., and Hunter, M.S. (2003). Facultative bacterial symbionts  
672 in aphids confer resistance to parasitic wasps. *Proc. Natl. Acad. Sci.* **100**, 1803–1807.
- 673 Oliver, K.M., Moran, N.A., and Hunter, M.S. (2005). Variation in resistance to parasitism in  
674 aphids is due to symbionts not host genotype. *Proc. Natl. Acad. Sci.* **102**, 12795–12800.
- 675 Oliver, K.M., Moran, N.A., and Hunter, M.S. (2006). Costs and benefits of a superinfection of  
676 facultative symbionts in aphids. *Proc. R. Soc. B Biol. Sci.* **273**, 1273–1280.

- 677 Paquet, V.E., and Charette, S.J. (2016). Amoeba-resisting bacteria found in multilamellar bodies  
678 secreted by *Dictyostelium discoideum*: social amoebae can also package bacteria. FEMS  
679 Microbiol. Ecol. 92, fiw025.
- 680 Pérez-Brocal, V., Latorre, A., and Moya, A. (2011). Symbionts and Pathogens: What is the  
681 Difference? In Between Pathogenicity and Commensalism, U. Dobrindt, J.H. Hacker, and C.  
682 Svanborg, eds. (Berlin, Heidelberg: Springer Berlin Heidelberg), pp. 215–243.
- 683 Queller, D.C., and Strassmann, J.E. (2018). Evolutionary Conflict. Annu. Rev. Ecol. Evol. Syst.  
684 49.
- 685 Ratzka, C., Gross, R., and Feldhaar, H. (2012). Endosymbiont Tolerance and Control within  
686 Insect Hosts. Insects 3, 553–572.
- 687 Reynolds, S., and Rolff, J. (2008). Immune function keeps endosymbionts under control. J. Biol.  
688 7, 28.
- 689 Sachs, J.L., and Wilcox, T.P. (2006). A shift to parasitism in the jellyfish symbiont *Symbiodinium*  
690 *microadriaticum*. Proc. R. Soc. B Biol. Sci. 273, 425–429.
- 691 Satterthwaite, F.E. (1946). An Approximate Distribution of Estimates of Variance Components.  
692 Biom. Bull. 2, 110–114.
- 693 smith, jeff, Queller, D.C., and Strassmann, J.E. (2014). Fruiting bodies of the social amoeba  
694 *Dictyostelium discoideum* increase spore transport by *Drosophila*. BMC Evol. Biol. 14, 105.
- 695 Soto, M.J., Domínguez-Ferreras, A., Pérez-Mendoza, D., Sanjuán, J., and Olivares, J. (2009).  
696 Mutualism versus pathogenesis: the give-and-take in plant-bacteria interactions. Cell. Microbiol.  
697 11, 381–388.
- 698 Stallforth, P., Brock, D.A., Cantley, A.M., Tian, X., Queller, D.C., Strassmann, J.E., and Clardy, J.  
699 (2013). A bacterial symbiont is converted from an inedible producer of beneficial molecules into  
700 food by a single mutation in the *gacA* gene. Proc. Natl. Acad. Sci. U. S. A. 110, 14528–14533.
- 701 Su, S., Bangar, H., Saldanha, R., Pemberton, A., Aronow, B., Dean, G.E., Lamkin, T.J., and  
702 Hassett, D.J. (2014). Construction and characterization of stable, constitutively expressed,  
703 chromosomal green and red fluorescent transcriptional fusions in the select agents, *Bacillus*  
704 *anthracis*, *Yersinia pestis*, *Burkholderia mallei*, and *Burkholderia pseudomallei*.  
705 MicrobiologyOpen 3, 610–629.
- 706 Takeshita, K., and Kikuchi, Y. (2017). *Riptortus pedestris* and *Burkholderia* symbiont: an ideal  
707 model system for insect–microbe symbiotic associations. Res. Microbiol. 168, 175–187.
- 708 Taylor-Mulneix, D.L., Bendor, L., Linz, B., Rivera, I., Ryman, V.E., Dewan, K.K., Wagner, S.M.,  
709 Wilson, E.F., Hilburger, L.J., Cuff, L.E., et al. (2017). *Bordetella bronchiseptica* exploits the  
710 complex life cycle of *Dictyostelium discoideum* as an amplifying transmission vector. PLOS Biol.  
711 15, e2000420.
- 712 Wernegreen, J.J. (2017). Ancient bacterial endosymbionts of insects: Genomes as sources of  
713 insight and springboards for inquiry. Exp. Cell Res. 358, 427–432.

714 Werner, G.D.A., Cornwell, W.K., Cornelissen, J.H.C., and Kiers, E.T. (2015). Evolutionary  
715 signals of symbiotic persistence in the legume-rhizobia mutualism. *Proc. Natl. Acad. Sci. U. S. A.*  
716 *112*, 10262–10269.

717 (2015). *Mutualism* (Oxford, United Kingdom: Oxford University Press).

718



719 **Tables**

| Set | Clone | Status | <i>Burkholderia</i>   | Location Collected                  | GPS coordinates      |
|-----|-------|--------|-----------------------|-------------------------------------|----------------------|
| 1   | QS9   | Naïve  | None                  | Virginia-Mt Lake Biological Station | N 37° 21', W 80° 31' |
|     | QS70  | Native | <i>B. agricolaris</i> | Texas- Houston Arboretum            | N 29° 46', W 95° 27' |
|     | QS11  | Native | <i>B. hayleyella</i>  | Virginia-Mt Lake Biological Station | N 37° 21', W 80° 31' |
| 2   | QS18  | Naïve  | None                  | Virginia-Mt Lake Biological Station | N 37° 21', W 80° 31' |
|     | QS159 | Native | <i>B. agricolaris</i> | Virginia-Mt Lake Biological Station | N 37° 21', W 80° 31' |
|     | QS23  | Native | <i>B. hayleyella</i>  | Virginia-Mt Lake Biological Station | N 37° 21', W 80° 31' |
| 3   | QS17  | Naïve  | None                  | Virginia-Mt Lake Biological Station | N 37° 21', W 80° 31' |
|     | QS161 | Native | <i>B. agricolaris</i> | Virginia-Mt Lake Biological Station | N 37° 21', W 80° 31' |
|     | QS22  | Native | <i>B. hayleyella</i>  | Virginia-Mt Lake Biological Station | N 37° 21', W 80° 31' |
| 4   | QS6   | Naïve  | None                  | Virginia-Mt Lake Biological Station | N 37° 21', W 80° 31' |
|     | NC21  | Native | <i>B. agricolaris</i> | North Carolina- Linville Falls      | N 35° 57', W 81° 57' |
|     | QS21  | Native | <i>B. hayleyella</i>  | Virginia-Mt Lake Biological Station | N 37° 21', W 80° 31' |

720

721 **Table 1. *Dictyostelium discoideum* clones used for this study.** Clones are divided  
722 into specific sets each with naive, native-ag, and native-ha field-collected counterparts.  
723 They were collected from Virginia, North Carolina, and Texas as indicated.

## 724 Figures & Figure Legends

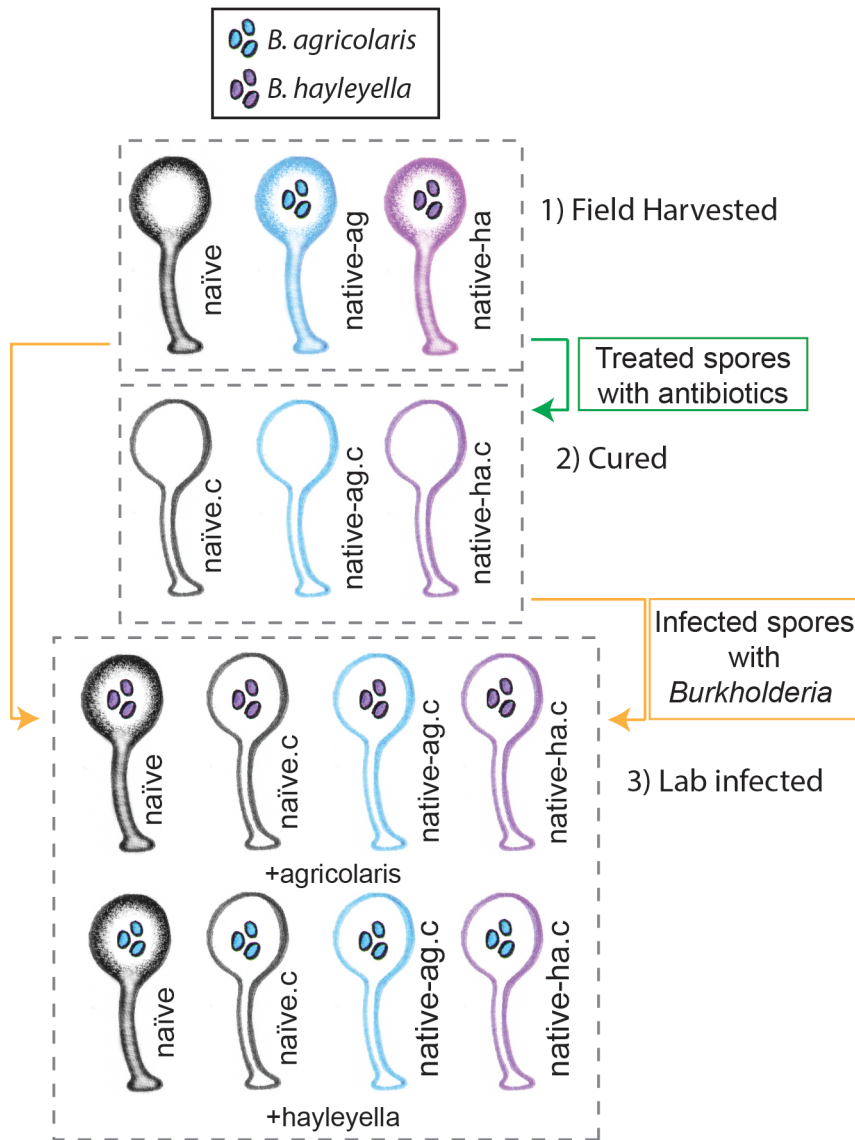

726 **Figure 1. Illustration of host-symbiont pairs used throughout the study.** *D.*  
727 *discoideum* clones were originally harvested from the wild in three different states:  
728 uninfected (indicated as naïve), or naturally infected with *B. agriculturalis* or *B. hayleyella*  
729 (indicated as native-ag, and native-ha respectively). Clones were treated with antibiotics  
730 to eliminate symbionts and are indicated with a ".c". Clones were subsequently exposed  
731 to *Burkholderia* to initiate new infections. Thus, experimental types include 1) Field  
732 harvested, 2) cured, and 3) lab infected hosts.

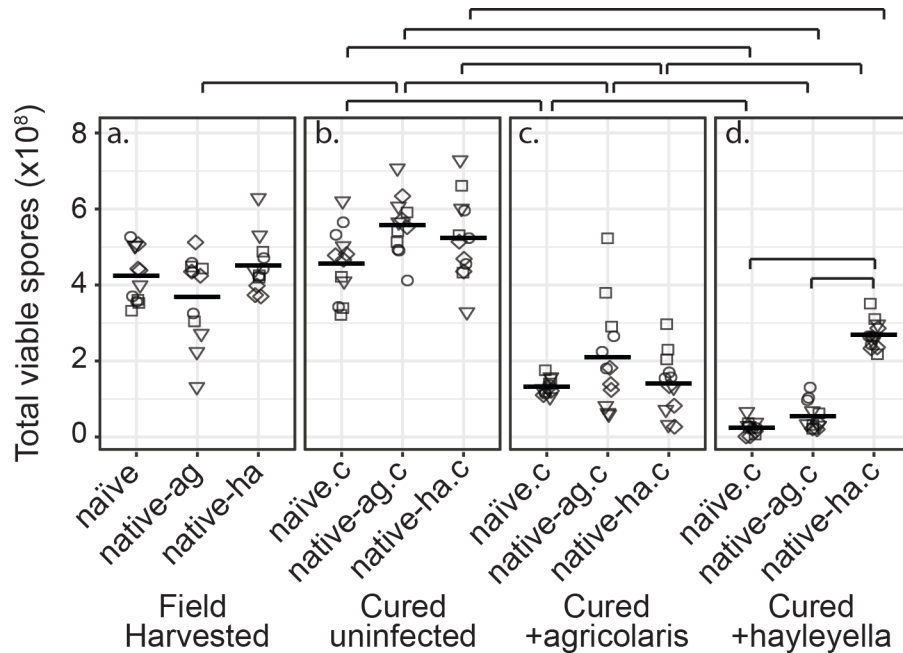

733

734

**Figure 2. *Burkholderia* Infections Differentially Alter Spore Viability According to**

735

***Burkholderia* Species and Host Background.** Total viable spores were determined for

736

naïve and native hosts in their field harvested (a), cured (b), *B. agricolaris* lab-infected

737

(c), and *B. hayleyella* lab-infected state (d). Four clones were measured for each type

738

with 3 replicates for each (squares, triangles, circles, and diamonds represent set 1-4

739

clones respectively). Spore viability for wild harvested *B. agricolaris* and *B. hayleyella*

740

host clones is higher than their cured-re-infected counterparts. Notably, spores from

741

infected *B. agricolaris* and *B. hayleyella* native hosts (either naturally infected or cured

742

and re-infected with their original *Burkholderia*) have a higher fitness than *Burkholderia*

743

infected non-native counterparts. Bars represent significant differences (p < 0.05, and as

744

indicated in supplemental tables).

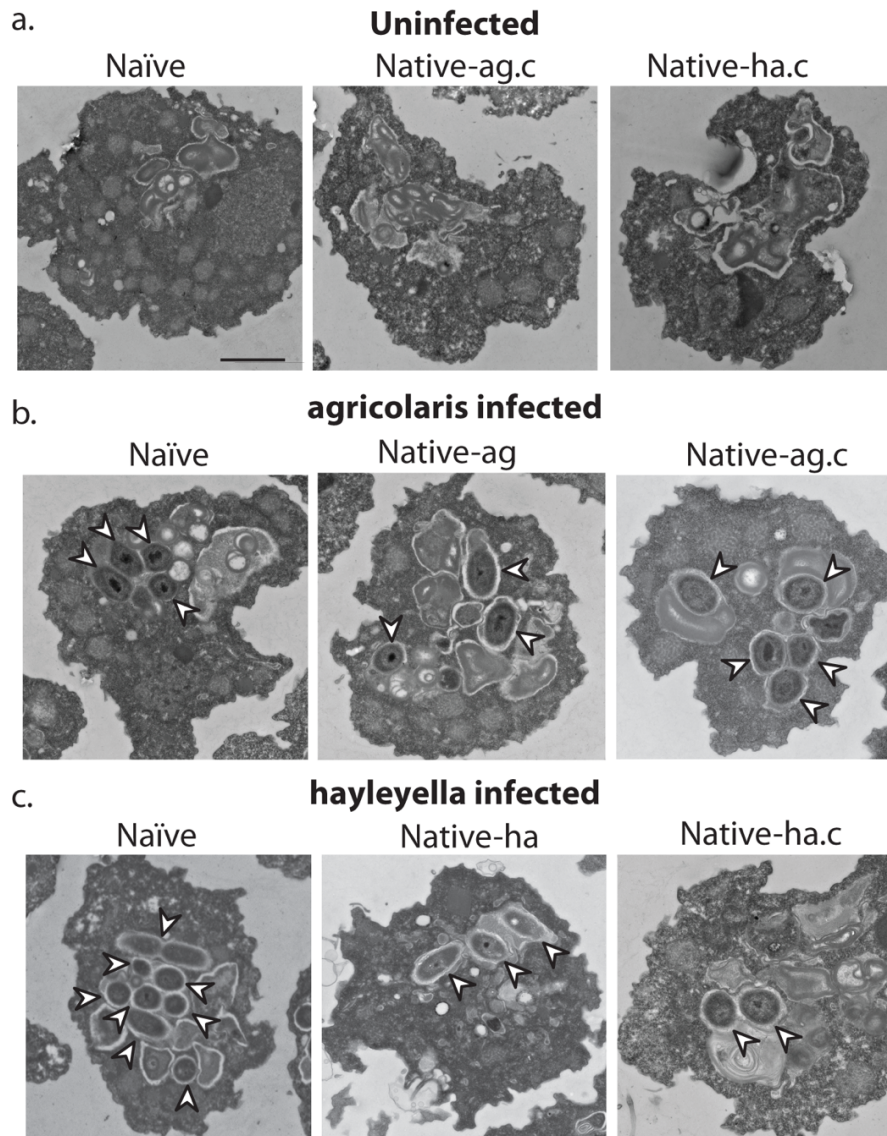

745

746 **Figure 3. Bacterial cells are found within *Burkholderia* exposed vegetative**  
747 **amoebae.** Transmission electron micrographs of vegetative amoebae show naïve and  
748 cured native amoebae with intracellular morphologies suggestive of active bacterial  
749 digestion with no evidence of intact intracellular bacteria (a). In contrast, bacterial cells  
750 can be found within *B. agricolaris* (b) and *B. hayleyella* (c) infected hosts. Arrows point to  
751 bacterial cells. More bacteria are observed in the *B. hayleyella* infected naïve host than  
752 in field harvested native-*hayleyella* and cured and re-infected native-*hayleyella* hosts (c).  
753 Bacterial cells appear to be within vacuole-like compartments. Scale bar (applicable to  
754 all): 2um.

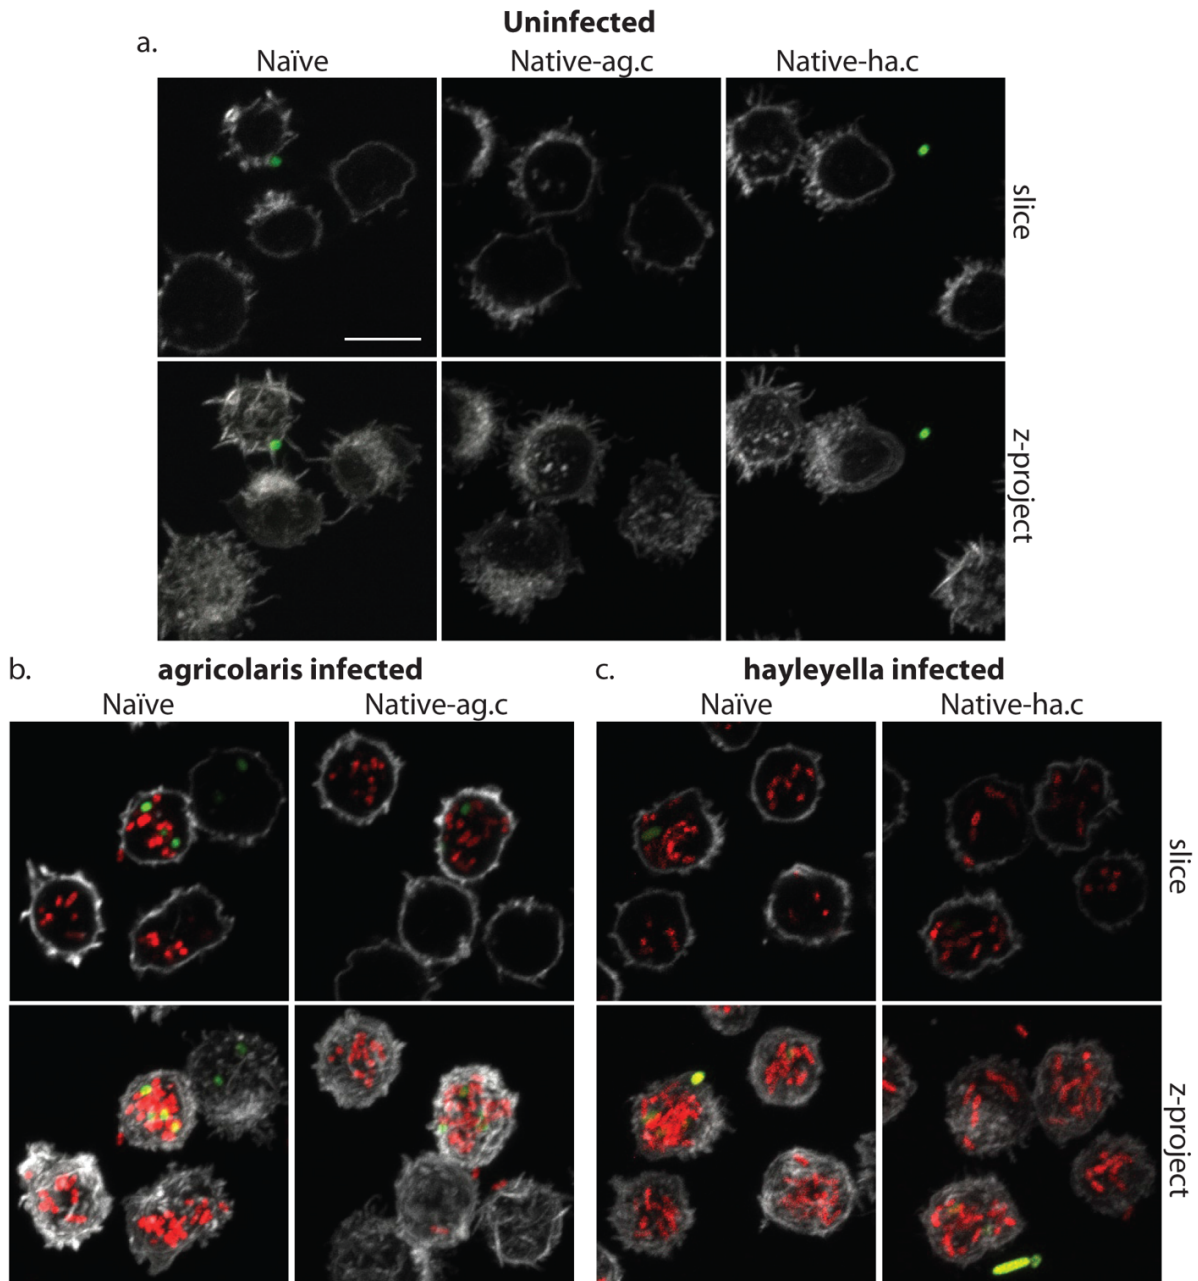

755

756 **Figure 4. *Burkholderia* is found abundantly in colonized vegetative amoebae.**

757 Confocal imaging of fixed and stained vegetative amoebae show little to no intracellular

758 bacteria in uninfected clones (a). However, abundant *Burkholderia* (*Burkholderia-RFP*

759 shown in red) is found in *B. agricolaris* (b) and *B. hayleyella* (c) infected hosts.

760 Occasional intracellular food bacteria (*Klebsiella-GFP* shown in green) is seen in *B.*

761 *agricolaris* hosts (c). Spore coats are stained with phalloidin shown in grey. Scale bar

762 10um.

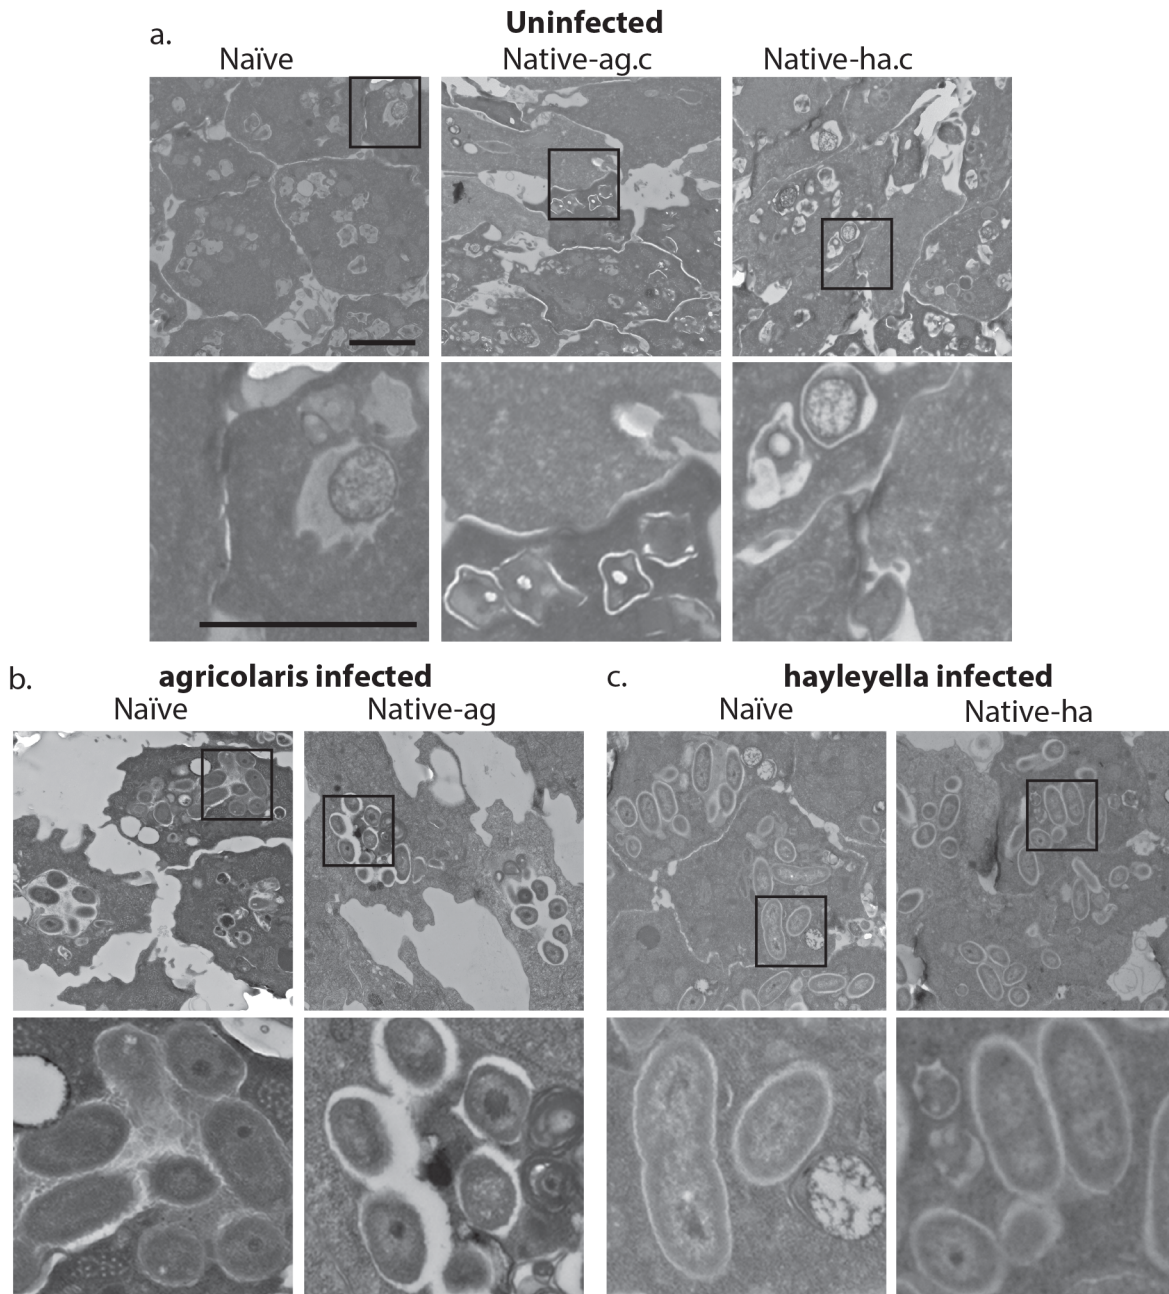

763

764 **Figure 5. Intracellular bacteria are retained in naïve migrating slugs exposed to**  
765 ***Burkholderia* and in native *Burkholderia* hosts.** Transmission electron micrographs of  
766 uninfected (a) show closely packed amoebae with internal structures reminiscent of  
767 previous bacterial digestion but without evidence of intact internal bacteria. In contrast,  
768 *B. agricolaris* (b) and *B. hayleyella* (c) infected slugs retain intracellular bacteria. Bottom  
769 panels represent magnified versions (see box) of upper panels. Scale bar (applicable to  
770 all panels in row) 2µm.

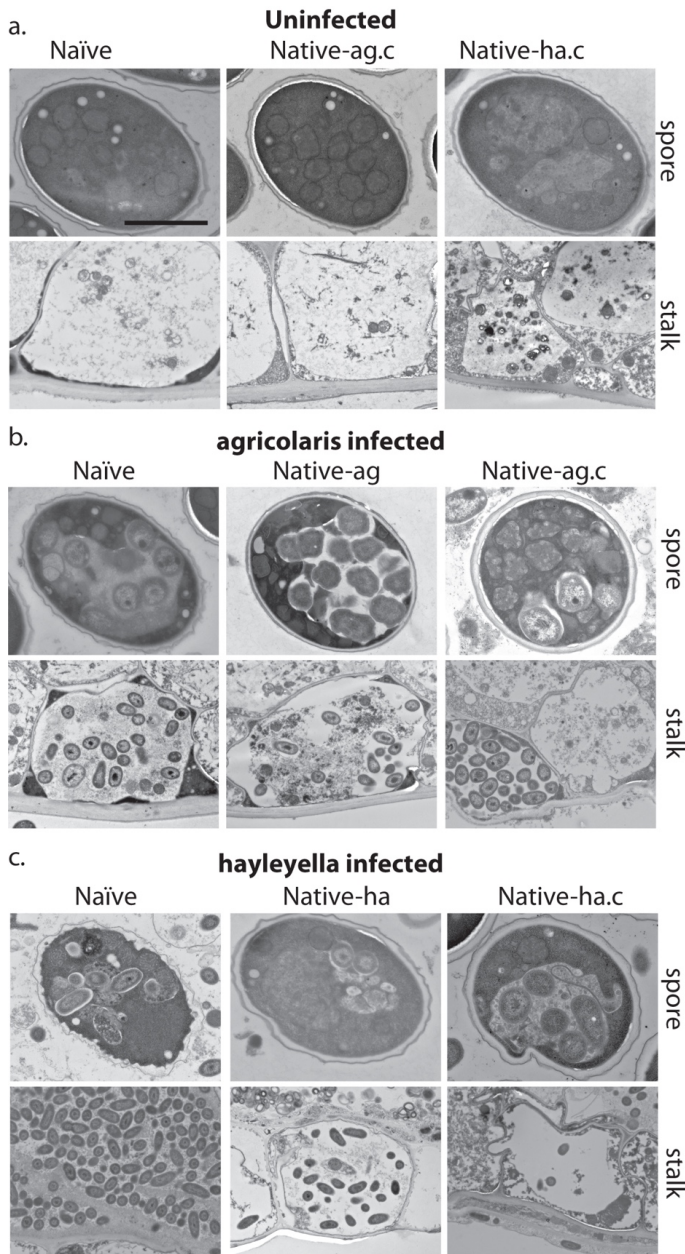

771

772 **Figure 6. Bacterial cells are retained in spore and stalk cells from *Burkholderia*-**  
773 **exposed hosts.** As visualized through transmission electron microscopy, (a) uninfected  
774 hosts form sturdy spores and stalk cells with no detectable bacteria. Spores and stalk  
775 cells retain intracellular bacteria in *B. agricolaris* (b) and *B. hayleyella* (c) hosts. Naïve *B.*  
776 *agricolaris* hosts appear structurally similar to uninfected cells while naïve *B. hayleyella*  
777 hosts have compromised spore coats and collapsed stalk structures filled with bacteria.  
778 Scale bar: 2 $\mu$ m.

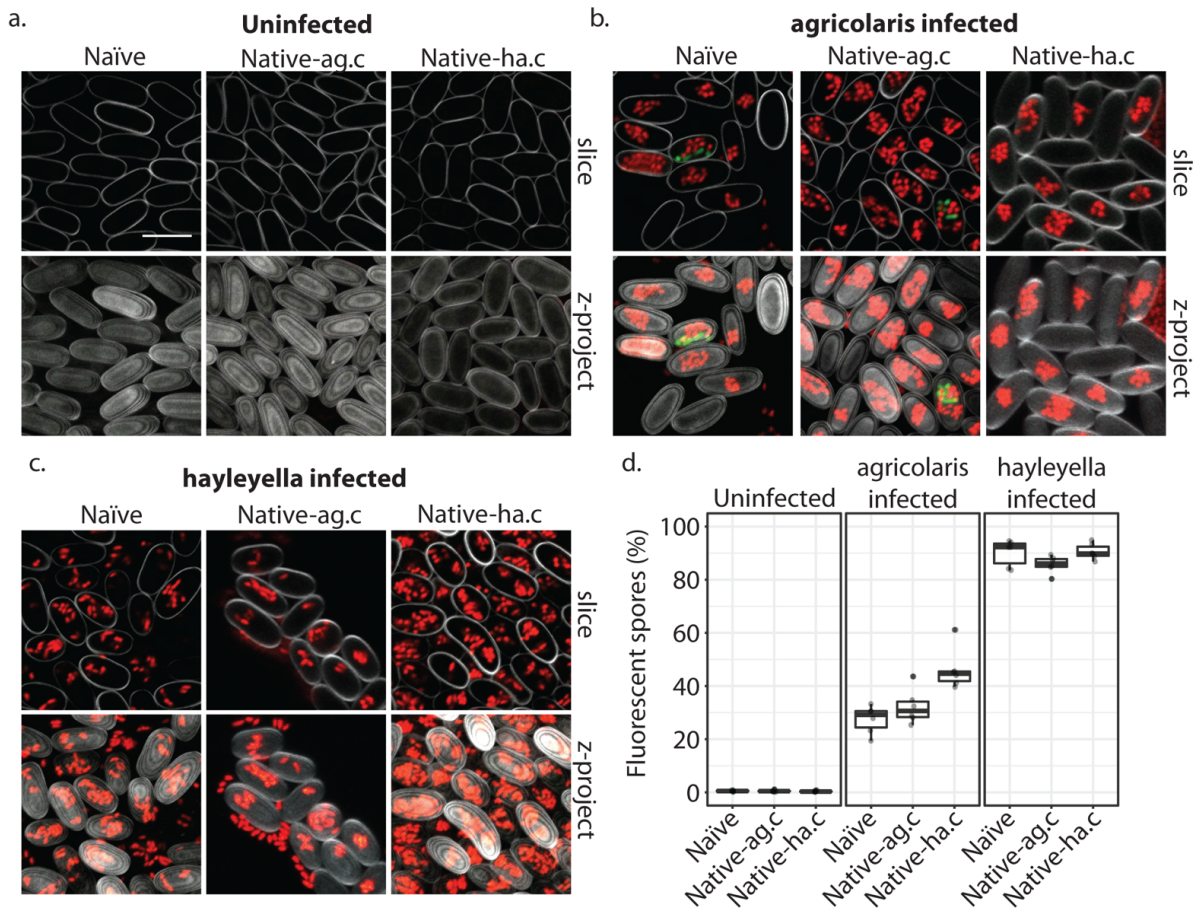

779

780 **Figure 7. *Burkholderia* is retained in the sori of developed *D. discoideum* hosts**  
781 **and the percent of *Burkholderia* positive spores differs according to *Burkholderia***  
782 **species.** Confocal images show no intra- or extracellular bacteria in uninfected spores  
783 (a). Abundant *Burkholderia* is seen in *B. agricolaris* (b) and *B. hayleyella* (c) hosts, with  
784 more infected spores seen for *B. hayleyella* (c). Detection of fluorescent spores  
785 (indicative of *Burkholderia*-RFP infection) demonstrates that the majority of *B. hayleyella*  
786 exposed hosts produce infected spores while a smaller fraction of *B. agricolaris* exposed  
787 hosts produce infected spores. Co-infection by food bacteria is occasionally observed in  
788 *B. agricolaris* infected spores (b). (*Klebsiella*-GFP shown in green, *Burkholderia*-RFP  
789 shown in red, and calcofluor stain shown in grey). Top panels are image slices; bottom  
790 panels are max intensity projections of z stacks. Scale bar: 10µm.



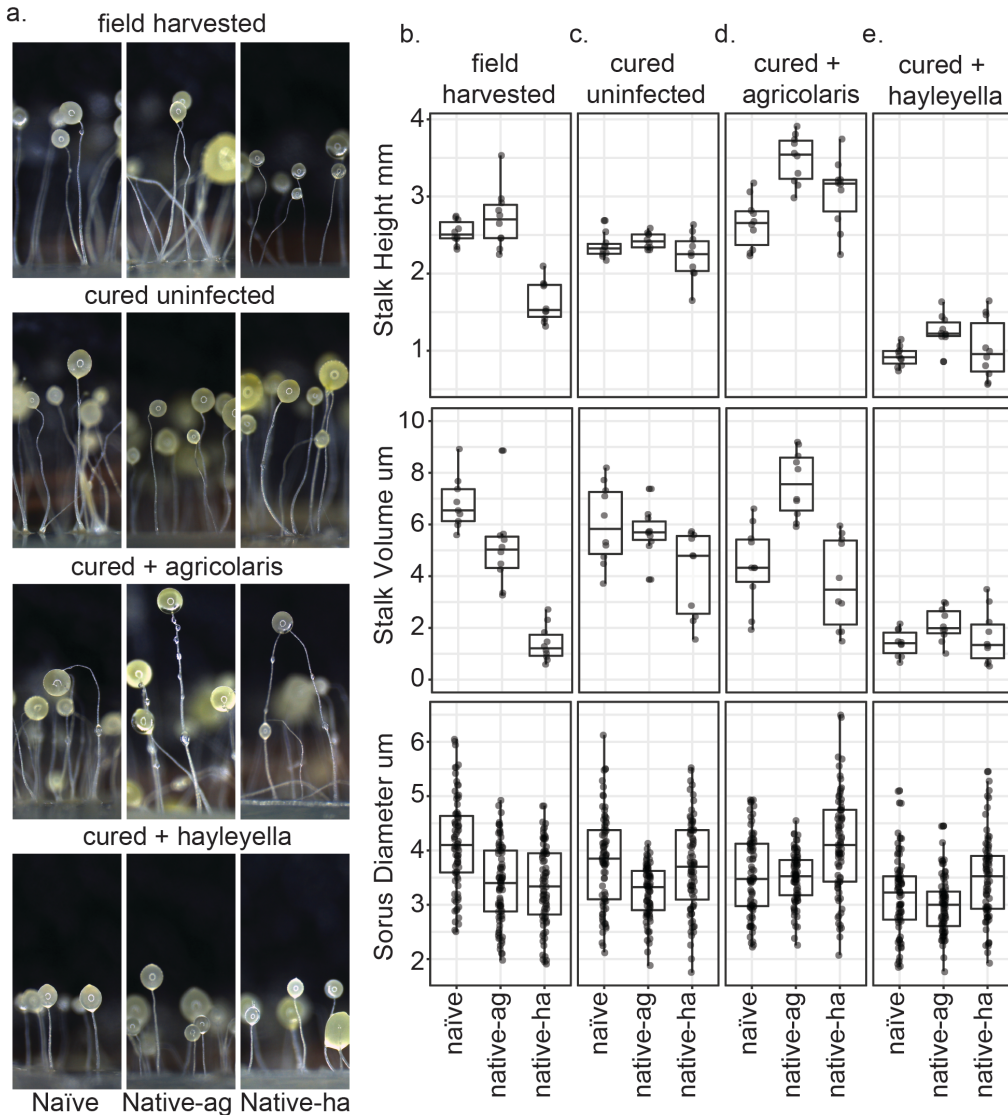

791

792

**Figure 8. Fruiting body morphology is differentially altered by *Burkholderia***

793

**colonization.** Macro photographs of fruiting bodies (a) show slightly different

794

morphologies according to *Burkholderia* infection status. Sori measurements

795

demonstrate that field collected native-*hayleyella* hosts produce shorter stalks and less

796

voluminous sori (b). Cured hosts produce similar fruiting body measurements across

797

host background (c). Cured hosts subsequently infected with *B. agricolaris* produce

798

slightly taller stalks, which is most noticeable in cured and re-infected native-*agricolaris*

799

hosts (d). Cured hosts subsequently infected with *B. hayleyella* all produce significantly

800

shorter stalks with overall smaller fruiting body dimensions (e).

801 **Supplemental Tables and Figures**

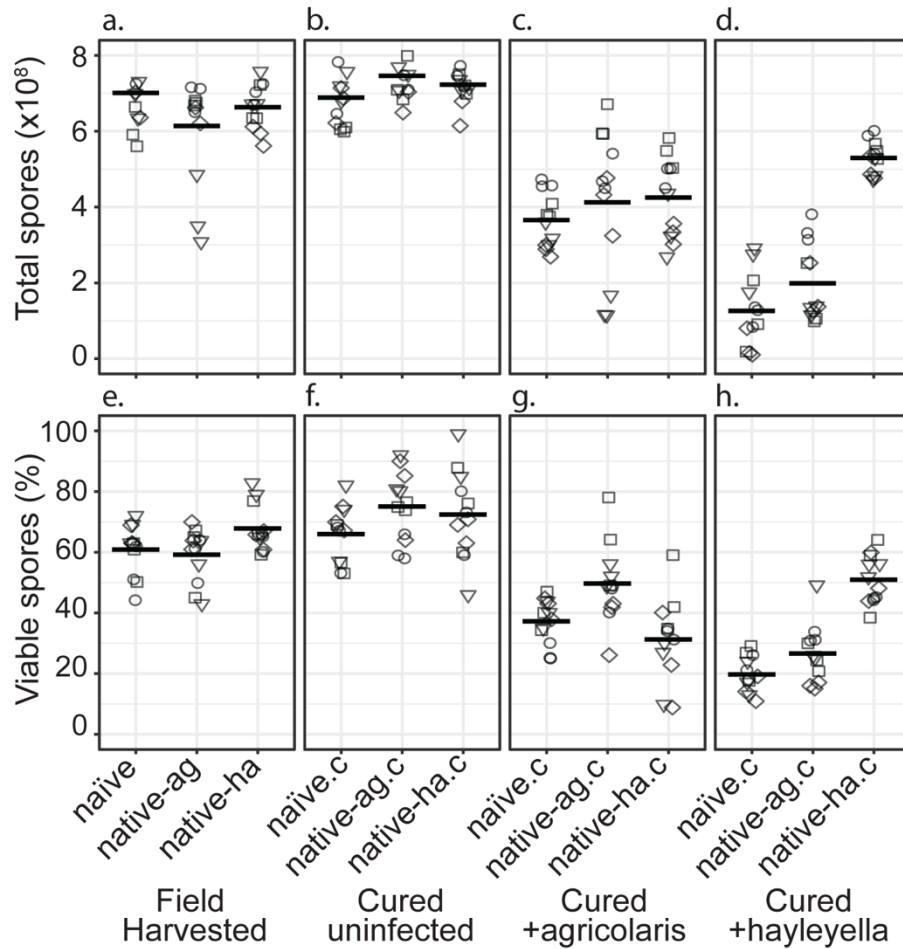

### Multi-lamellar Bodies

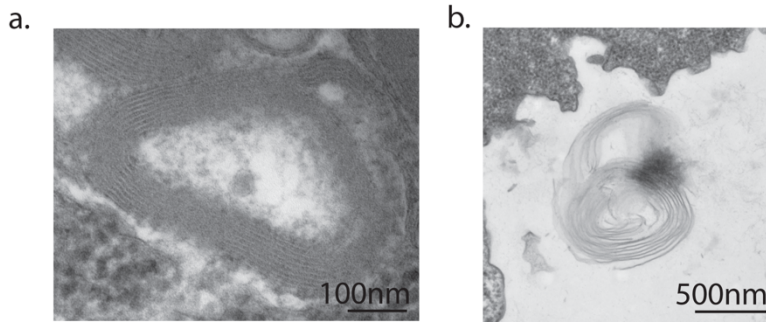

811

812 **Figure S2. Multi-lamellar bodies excreted by vegetative amoebae.** Transmission electron  
813 micrographs of vegetative amoebae identified multi-lamellar bodies inside uninfected amoebae,  
814 indicating successful digestion of bacterial food (a). Multi-lamellar bodies are eventually secreted  
815 into the surrounding medium (b).

| Question / Comparison                                                                                                                                                                                                                                             | Fitness Measure       |                        |                       |
|-------------------------------------------------------------------------------------------------------------------------------------------------------------------------------------------------------------------------------------------------------------------|-----------------------|------------------------|-----------------------|
|                                                                                                                                                                                                                                                                   | Percent Viable Spores | Total Spore Production | Total Viable Spores** |
| Are there fitness differences between field-collected states before curing?                                                                                                                                                                                       | <b>0.024</b>          | 0.11                   | 0.062                 |
| <b>a</b> <b>Naïve</b> vs. Native- <b>ag</b> .                                                                                                                                                                                                                     | 0.60                  | -                      | -                     |
| <b>Naïve</b> vs. <b>Native-ha*</b> .                                                                                                                                                                                                                              | <b>0.035</b>          | -                      | -                     |
| Native- <b>ag</b> vs. <b>Native-ha*</b>                                                                                                                                                                                                                           | <b>0.010</b>          | -                      | -                     |
| Are there fitness differences between field-collected states after curing?                                                                                                                                                                                        | 0.10                  | 0.84                   | 0.32                  |
| <b>b</b> <b>Naïve</b> .Cured vs. Native- <b>ag</b> .Cured                                                                                                                                                                                                         | -                     | -                      | -                     |
| <b>Naïve</b> .Cured vs. Native- <b>ha</b> .Cured                                                                                                                                                                                                                  | -                     | -                      | -                     |
| Native- <b>ag</b> .Cured vs. Native- <b>ha</b> .Cured                                                                                                                                                                                                             | -                     | -                      | -                     |
| Is there an overall effect on native clones of curing with antibiotics?                                                                                                                                                                                           | <b>&lt; 0.001</b>     | <b>&lt; 0.001</b>      | <b>0.008</b>          |
| <b>c</b> <b>Naïve.Cured</b> vs. Naïve                                                                                                                                                                                                                             | 0.76                  | 0.99                   | 0.95                  |
| <b>Native-ag.Cured*</b> vs. Native- <b>ag</b> .                                                                                                                                                                                                                   | <b>0.0012</b>         | <b>0.0027</b>          | <b>&lt; 0.001</b>     |
| Native- <b>ha</b> . <b>Cured</b> vs. Native- <b>ha</b> .                                                                                                                                                                                                          | 0.83                  | 0.49                   | 0.34                  |
| Does curing with antibiotics differentially affect the fitness of natural clones in terms of their <i>Burkholderia</i> infection status? ( <i>i.e.</i> , Is there an interaction between <i>Burkholderia</i> infection in the field and curing with antibiotics?) | <b>&lt; 0.001</b>     | <b>&lt; 0.001</b>      | <b>&lt; 0.001</b>     |

\* When significantly different, the red item with asterisk had the higher value

\*\* Total Viable Spores are the product of Percent Viable Spores and Total Spore Production

*N.B.*, Dashes (-) indicate that multiple comparisons were not performed because the main effect was not significant.

816

817 **Table S1. Statistical results of three fitness measures assayed for field-collected amoeba**  
818 **clones and after curing with antibiotics.** The three fitness measures were percent of spores  
819 that were viable, the total number of spores produced by a clone, and total viable spores. Total  
820 viable spores is the product of the other two measures. For each pairwise contrast, the essential  
821 difference in treatments is in boldface, and a treatment that is significantly higher than the other  
822 is marked with an asterisk and printed in red. Each of the fitness measures was analyzed with a  
823 set of Generalized Linear Mixed Models (GLMMs). This table gives the *p*-values for each  
824 question asked about main or interaction effects and the *post hoc* pairwise comparisons made,  
825 as relevant. Details about the statistical tests used can be found in the main text.

| Question / Comparison                                                                                                            | Fitness Measure       |                        |                      |
|----------------------------------------------------------------------------------------------------------------------------------|-----------------------|------------------------|----------------------|
|                                                                                                                                  | Percent Viable Spores | Total Spore Production | Total Viable Spores* |
| <b>a</b> Overall, are there fitness differences when either <i>Burkholderia</i> are added to cured clones?                       | < 0.001               | < 0.001                | < 0.001              |
| Overall, are there fitness differences between cured clones when <i>B. agricolaris</i> is added*?                                | < 0.001               | < 0.001                | < 0.001              |
| <b>b</b> Naïve.Cured+ <i>agricolaris</i> vs. Naïve.Cured*                                                                        | < 0.001               | < 0.001                | < 0.001              |
| Native- <i>ag</i> .Cured+ <i>agricolaris</i> vs. Native- <i>ag</i> .Cured*                                                       | < 0.001               | < 0.001                | < 0.001              |
| Native- <i>ha</i> .Cured+ <i>agricolaris</i> vs. Native- <i>ha</i> .Cured*                                                       | < 0.001               | < 0.001                | < 0.001              |
| Overall, are there fitness differences between cured clones when <i>B. hayleyella</i> is added*?                                 | < 0.001               | < 0.001                | < 0.001              |
| <b>c</b> Naïve.Cured+ <i>hayleyella</i> vs. Naïve.Cured*                                                                         | < 0.001               | < 0.001                | < 0.001              |
| Native- <i>ag</i> .Cured+ <i>hayleyella</i> vs. Native- <i>ag</i> .Cured*                                                        | < 0.001               | < 0.001                | < 0.001              |
| Native- <i>ha</i> .Cured+ <i>hayleyella</i> vs. Native- <i>ha</i> .Cured*                                                        | 0.0001                | < 0.001                | < 0.001              |
| Is there an overall difference in fitness after the addition of <i>B. agricolaris</i> * vs. <i>B. hayleyella</i> ?               | < 0.001               | < 0.001                | < 0.001              |
| <b>d</b> Naïve.Cured+ <i>agricolaris</i> * vs. Naïve.Cured+ <i>hayleyella</i>                                                    | 0.002                 | < 0.001                | 0.027                |
| Native- <i>ag</i> .Cured+ <i>agricolaris</i> * vs. Native- <i>ag</i> .Cured+ <i>hayleyella</i>                                   | < 0.001               | < 0.001                | 0.0002               |
| Native- <i>ha</i> .Cured+ <i>agricolaris</i> vs. Native- <i>ha</i> .Cured+ <i>hayleyella</i> *                                   | 0.0003                | 0.12                   | 0.0037               |
| Is there an overall interaction between which <i>Burkholderia</i> is added and the native infection status of the amoeba clones? | < 0.001               | < 0.001                | < 0.001              |
| Do clones have higher fitness when their own <i>Burkholderia</i> are added?                                                      |                       |                        |                      |
| <b>e</b> Native- <i>ag</i> .Cured+ <i>agricolaris</i> vs. Naïve.Cured+ <i>agricolaris</i>                                        | 0.83                  | 0.93                   | 0.28                 |
| Native- <i>ag</i> .Cured+ <i>agricolaris</i> vs. Native- <i>ha</i> .Cured+ <i>agricolaris</i>                                    | 0.43                  | 1.0                    | 0.45                 |
| Native- <i>ha</i> .Cured+ <i>hayleyella</i> * vs. Naïve.Cured+ <i>hayleyella</i>                                                 | 0.0009                | < 0.001                | < 0.001              |
| Native- <i>ha</i> .Cured+ <i>hayleyella</i> * vs. Native- <i>ag</i> .Cured+ <i>hayleyella</i>                                    | 0.084                 | < 0.001                | < 0.001              |

\* When significantly different, the red item with asterisk had the higher value

\*\*Total Viable Spores is the product of Percent Viable Spores and Total Spore Production ↓

826

827 **Table S2. Statistical results of three fitness measures assayed for antibiotic-cured**  
828 **amoeba clones after experimental addition of *Burkholderia*.** The three fitness measures  
829 were again percent of spores that were viable, the total number of spores produced by a clone,  
830 and total viable spores. Total viable spores is the product of the other two measures. For each  
831 pairwise contrast, the essential difference in treatments is in boldface, and a treatment that is  
832 significantly higher than the other is marked with an asterisk and printed in red. Each of the  
833 fitness measures was analyzed with a set of Generalized Linear Mixed Models (GLMMs). This  
834 table gives the *p*-values for each question asked about main or interaction effects and the *post*  
835 *hoc* pairwise comparisons made, as relevant. Details about the statistical tests used can be  
836 found in the main text.

| Question / Comparison                                                                                                              |                                                                                  | Stalk Length | Stalk Volume  |
|------------------------------------------------------------------------------------------------------------------------------------|----------------------------------------------------------------------------------|--------------|---------------|
| Overall, are there morphological differences between the three amoeba hosts?                                                       |                                                                                  | < 0.001      | < 0.001       |
| a                                                                                                                                  | <b>Naïve*</b> vs. Native- <b>ag</b> .                                            | 0.34         | <b>0.0035</b> |
|                                                                                                                                    | <b>Naïve*</b> vs. Native- <b>ha</b> .                                            | < 0.001      | < 0.001       |
|                                                                                                                                    | <b>Native-ag*</b> vs. Native- <b>ha</b> .                                        | < 0.001      | < 0.001       |
| Does curing with antibiotics affect the stalk morphology of the three amoeba hosts?                                                |                                                                                  | 0.61         | 0.077         |
| b                                                                                                                                  | Naïve vs. Naïve. <b>Cured</b> .QS9                                               | -            | -             |
|                                                                                                                                    | Native- <b>ag</b> vs. Native- <b>ag</b> . <b>Cured</b> .QS70                     | -            | -             |
|                                                                                                                                    | Native- <b>ha</b> vs. Native- <b>ha</b> . <b>Cured</b> .QS11                     | -            | -             |
| Is there an overall effect on stalk morphology when <i>B. agricolaris</i> is added to cured amoeba hosts?                          |                                                                                  | < 0.001      | 0.95          |
| c                                                                                                                                  | Naïve.Cured vs. Naïve.Cured+ <b>agricolaris</b>                                  | 0.34         | -             |
|                                                                                                                                    | Native- <b>ag</b> .Cured vs. <b>Native-ag.Cured+agricolaris*</b>                 | < 0.001      | -             |
|                                                                                                                                    | Native- <b>ha</b> .Cured vs. <b>Native-ha.Cured+agricolaris*</b>                 | < 0.001      | -             |
| Is there an overall effect on stalk morphology when <i>B. hayleyella</i> is added to cured* amoeba hosts?                          |                                                                                  | < 0.001      | < 0.001       |
| d                                                                                                                                  | <b>Naïve.Cured*</b> vs. Naïve.Cured+ <b>hayleyella</b>                           | < 0.001      | < 0.001       |
|                                                                                                                                    | <b>Native-ag.Cured*</b> vs. Native- <b>ag.Cured+hayleyella</b>                   | < 0.001      | < 0.001       |
|                                                                                                                                    | <b>Native-ha.Cured*</b> vs. Native- <b>ha.Cured+hayleyella</b>                   | < 0.001      | <b>0.0012</b> |
| Overall, is there an interaction between the amoeba hosts' native infection statuses and the species of <i>Burkholderia</i> added? |                                                                                  | <b>0.001</b> | < 0.001       |
| <u>Do amoeba hosts have a distinct stalk morphology when their own <i>Burkholderia</i> are added?</u>                              |                                                                                  |              |               |
| e                                                                                                                                  | <b>Native-ha.Cured+agricolaris*</b> vs. Native- <b>ha.Cured+hayleyella</b>       | < 0.001      | <b>0.01</b>   |
|                                                                                                                                    | <b>Native-ag.Cured+agricolaris*</b> vs. Native- <b>ag.Cured+hayleyella</b>       | < 0.001      | < 0.001       |
| <u>Does the Native-naïve clone have a distinct stalk morphology when <i>Burkholderia</i> are added?</u>                            |                                                                                  |              |               |
|                                                                                                                                    | <b>Native-naïve.Cured+agricolaris*</b> vs. Native- <b>naïve.Cured+hayleyella</b> | < 0.001      | < 0.001       |

\* When significantly different, the red item with asterisk had the higher value

\*\*Total Viable Spores is the product of Percent Viable Spores and Total Spore Production

N.B., Dashes (-) indicate that multiple comparisons were not performed because the main effect was not significant.

837

838 **Table S3. Statistical results for stalk morphology.** Each of the stalk measures was analyzed  
839 with a set of Generalized Linear Mixed Models (GLMMs). This table gives the *p*-values for each  
840 question asked about main or interaction effects and the *post hoc* pairwise comparisons made,  
841 as relevant. For each pairwise contrast, the essential difference in treatments is in boldface, and  
842 a treatment that is significantly higher than the other is marked with an asterisk and printed in  
843 red. Details about the statistical tests used can be found in the main text. One clone of each  
844 native type was tested: QS9 naïve; QS70 *ag*-infected; QS11 *ha*-infected.

| Question / Comparison                                                                                                            |                                                                                     | Sorus Diameter | Sorus Volume  |
|----------------------------------------------------------------------------------------------------------------------------------|-------------------------------------------------------------------------------------|----------------|---------------|
| Overall, are there morphological differences between the three amoeba hosts?                                                     |                                                                                     | < 0.001        | < 0.001       |
| a                                                                                                                                | <b>Naïve*</b> vs. Native- <b>ag</b> .                                               | < 0.001        | < 0.001       |
|                                                                                                                                  | <b>Naïve*</b> vs. Native- <b>ha</b> .                                               | < 0.001        | < 0.001       |
|                                                                                                                                  | Native- <b>ag</b> . vs. Native- <b>ha</b> .                                         | 0.98           | 0.99          |
| Does curing with antibiotics affect the sorus morphology of the three amoeba hosts?                                              |                                                                                     | 0.63           | 0.80          |
| b                                                                                                                                | Naïve vs. Naïve. <b>Cured</b>                                                       | -              | -             |
|                                                                                                                                  | Native- <b>ag</b> vs. Native- <b>ag</b> . <b>Cured</b>                              | -              | -             |
|                                                                                                                                  | Native- <b>ha</b> vs. Native- <b>ha</b> . <b>Cured</b>                              | -              | -             |
| Is there an overall effect on sorus morphology when <i>B. agricolaris</i> is added to cured amoeba hosts?                        |                                                                                     | < 0.001        | < 0.001       |
| c                                                                                                                                | Naïve.Cured vs. Naïve.Cured+ <b>agricolaris</b>                                     | 0.30           | 0.45          |
|                                                                                                                                  | Native- <b>ag</b> .Cured vs. Native- <b>ag</b> .Cured+ <b>agricolaris</b>           | 0.31           | 0.25          |
|                                                                                                                                  | Native- <b>ha</b> .Cured vs. <b>Native-ha.Cured+agricolaris*</b>                    | <b>0.012</b>   | <b>0.036</b>  |
| Is there an overall effect on sorus morphology when <i>B. hayleyella</i> is added to cured amoeba hosts?                         |                                                                                     | < 0.001        | < 0.001       |
| d                                                                                                                                | <b>Naïve.Cured*</b> vs. Naïve.Cured+ <b>hayleyella</b>                              | < 0.001        | < 0.001       |
|                                                                                                                                  | Native- <b>ag</b> .Cured vs. Native- <b>ag</b> .Cured+ <b>hayleyella</b>            | 0.53           | 0.34          |
|                                                                                                                                  | Native- <b>ha</b> .Cured vs. Native- <b>ha</b> .Cured+ <b>hayleyella</b>            | 0.52           | 0.63          |
| Overall, is there an interaction between the amoeba hosts' native infection status and the species of <i>Burkholderia</i> added? |                                                                                     | <b>0.0004</b>  | <b>0.0014</b> |
| Do amoeba have a distinct sorus morphology when their own <i>Burkholderia</i> are added?                                         |                                                                                     |                |               |
| e                                                                                                                                | <b>Native-ha.Cured+agricolaris*</b> vs. Native- <b>ha</b> .Cured+ <b>hayleyella</b> | < 0.001        | < 0.001       |
|                                                                                                                                  | <b>Native-ha.Cured+agricolaris*</b> vs. Native- <b>ha</b> .Cured+ <b>hayleyella</b> | <b>0.0005</b>  | < 0.001       |
| Does the naïve clone have a distinct sorus morphology when <i>Burkholderia</i> are added?                                        |                                                                                     |                |               |
|                                                                                                                                  | <b>Native-naïve.Cured+agricolaris*</b> vs. Native-naïve.Cured+ <b>hayleyella</b>    | <b>0.018</b>   | <b>0.011</b>  |

\* When significantly different, the red item with asterisk had the higher value

\* \*Total Viable Spores is the product of Percent Viable Spores and Total Spore Production

845 N.B., Dashes (-) indicate that multiple comparisons were not performed because the main effect was not significant.

846 **Table S4. Statistical results for sorus morphology.** Each of the spore measures was  
847 analyzed with a set of Generalized Linear Mixed Models (GLMMs). This table gives the *p*-values  
848 for each question asked about main or interaction effects and the *post hoc* pairwise comparisons  
849 made, as relevant. For each pairwise contrast, the essential difference in treatments is in  
850 boldface, and a treatment that is significantly higher than the other is marked with an asterisk  
851 and printed in red. Details about the statistical tests used can be found in the main text. One  
852 clone of each native type was tested: QS9 naïve; QS70 *ag*-infected; QS11 *ha*-infected.

853
